# Supplementary material for: Octahedral to trigonal prismatic distortion driven by subjacent orbital π antibonding interactions and modulated by ligand redox noninnocence
Source: Royal Society of Chemistry journal article supplement (doi:10.1039/c4cc03404j), 2014-01-01
Supplement: c4cc03404j1.pdf [file c4cc03404j1.pdf]

## Electronic Supplementary Information for

### “Octahedral to trigonal prismatic distortion driven by subjacent orbital $\pi$ antibonding interactions and modulated by ligand redox noninnocence”

Jacqueline Cipressi and Seth N. Brown\*

251 Nieuwland Science Hall, Department of Chemistry and Biochemistry  
University of Notre Dame, Notre Dame, IN 46556-5670 USA

#### Table of Contents:

|                                                                                                                                                  |     |
|--------------------------------------------------------------------------------------------------------------------------------------------------|-----|
| <b>Procedures and preparative details</b>                                                                                                        | S2  |
| <b>Table S1.</b> Crystal data for Ru(DOPO) <sub>2</sub> and Os(DOPO) <sub>2</sub>                                                                | S8  |
| <b>Table S2.</b> Crystal data for Ru(ONO) <sub>2</sub> •CHCl <sub>3</sub> •1.31 CH <sub>3</sub> CN and Os(ONO) <sub>2</sub> •2 CHCl <sub>3</sub> | S9  |
| <b>Figure S1.</b> Thermal ellipsoid plots of Ru(DOPO) <sub>2</sub> and Os(DOPO) <sub>2</sub>                                                     | S10 |
| <b>Figure S2.</b> Overlay plots of crystallographically inequivalent molecules in Ru(ONO) <sub>2</sub> and Os(ONO) <sub>2</sub>                  | S11 |
| <b>Table S3.</b> Distances, angles, and MOS for Ru(DOPO) <sub>2</sub> and Os(DOPO) <sub>2</sub>                                                  | S12 |
| <b>Table S4.</b> Distances, angles, and MOS for Ru(ONO) <sub>2</sub> and Os(ONO) <sub>2</sub>                                                    | S13 |
| <b>Figure S3.</b> Optical spectra of ML <sub>2</sub> (M = Ru, Os; L = DOPO, ONO)                                                                 | S14 |
| <b>Figure S4.</b> Cyclic voltammograms of ML <sub>2</sub> (M = Ru, Os; L = DOPO, ONO)                                                            | S15 |
| <b>Table S5.</b> Redox potentials of ML <sub>2</sub> (M = Ru, Os; L = DOPO, ONO)                                                                 | S15 |
| <b>Figure S5.</b> Variable-temperature <sup>1</sup> H NMR spectra of Os(ONO) <sub>2</sub>                                                        | S16 |
| <b>Figure S6.</b> Eyring plot of symmetrization reaction of Os(ONO) <sub>2</sub>                                                                 | S16 |
| <b>DFT Calculations</b>                                                                                                                          |     |
| (a) Fe(ONO) <sub>2</sub>                                                                                                                         | S17 |
| (b) [Co(ONO) <sub>2</sub> ] <sup>+</sup>                                                                                                         | S18 |
| (c) [Tc(ONO) <sub>2</sub> ] <sup>-</sup>                                                                                                         | S19 |
| (d) Ru(ONO) <sub>2</sub>                                                                                                                         | S20 |
| (e) Ru(DOPO) <sub>2</sub>                                                                                                                        | S21 |
| (f) [Rh(ONO) <sub>2</sub> ] <sup>+</sup>                                                                                                         | S22 |
| (g) [Re(ONO) <sub>2</sub> ] <sup>+</sup>                                                                                                         | S23 |
| (h) [Re(ONO) <sub>2</sub> ] <sup>-</sup> , minimum-energy (C <sub>2</sub> ) structure                                                            | S24 |
| (i) [Re(ONO) <sub>2</sub> ] <sup>-</sup> , constrained to D <sub>2</sub> symmetry                                                                | S25 |
| (j) Os(ONO) <sub>2</sub> , minimum-energy (C <sub>2</sub> ) structure                                                                            | S26 |
| (k) Os(ONO) <sub>2</sub> , constrained to D <sub>2</sub> symmetry                                                                                | S27 |
| (l) Os(DOPO) <sub>2</sub>                                                                                                                        | S28 |
| (m) [Ir(ONO) <sub>2</sub> ] <sup>+</sup>                                                                                                         | S29 |
| <b>References</b>                                                                                                                                | S30 |

**General Procedures.** Except as noted, all procedures were carried out on the benchtop without precautions to exclude air or moisture. When necessary, chlorinated solvents were dried over 4 Å molecular sieves, followed by CaH<sub>2</sub>. Pb(ONO<sup>Q</sup>)<sub>2</sub> was prepared by a modification<sup>S1</sup> of the method of McGarvey and coworkers.<sup>S2</sup> Di-μ-chlorobis[(*p*-cymene)chloroosmium(II)]<sup>S3</sup> and Pb(DOPO<sup>Q</sup>)<sub>2</sub><sup>S4</sup> were prepared using published procedures. All other reagents were commercially available and used without further purification. <sup>1</sup>H and {<sup>1</sup>H} <sup>13</sup>C NMR spectra were measured using a Bruker Avance DPX-400 or -500 spectrometer and were referenced to the solvent residual signals. Infrared spectra were recorded on a JASCO FT/IR-6300 spectrometer using the ATR attachment. UV-visible spectra were measured in a 1-cm quartz cell on a Thermo Scientific Evolution Array spectrophotometer. Mass spectra were measured on a Bruker micrOTOF II spectrometer using electrospray ionization; isotope envelopes agreed with the proposed formulations. Elemental analyses were performed by Robertson Microlit Laboratories (Ledgewood, NJ, USA).

**Bis(2,4,6,8-tetra-*tert*-butyl-1,9-dioxophenoxazinato)ruthenium, Ru(DOPO)<sub>2</sub>.** In the drybox, di-μ-chlorobis[(*p*-cymene)chlororuthenium(II)] (Strem, 0.0598 g, 0.0975 mmol) and bis(2,4,6,8-tetra-*tert*-butyl-1,9-dioxophenoxazinato)lead(II), Pb(DOPO<sup>Q</sup>)<sub>2</sub> (0.2042 g, 0.1891 mmol, 1.94 equiv per Ru dimer) were weighed into a 20-mL scintillation vial and dissolved in 5 mL CHCl<sub>3</sub> to give a teal solution. The vial was capped and removed from the drybox. It was placed in a 60 °C oil bath for 24 h. After removing the vial from the oil bath and allowing it to cool to room temperature, the mixture was gravity filtered in the air. To the filtrate was added 5 mL acetonitrile, causing precipitation of blue crystals. After standing 1 h at room temperature, the mixture was suction filtered on a glass frit and the precipitate washed thoroughly with 15 mL CH<sub>3</sub>CN. The wash was combined with the original filtrate to yield a second crop after 48 h standing, and a third crop after 72 h, which were isolated as described above to give a combined

yield of 0.1003 g Ru(DOPO)<sub>2</sub> (55%). <sup>1</sup>H NMR (CDCl<sub>3</sub>): δ 1.13, 1.67 (s, 36H each, <sup>t</sup>Bu), 7.42 (s, 4H, ArH). <sup>13</sup>C {<sup>1</sup>H} NMR (C<sub>6</sub>D<sub>6</sub>): δ 29.53, 31.14 (C(CH<sub>3</sub>)<sub>3</sub>), 34.44, 35.29 (C(CH<sub>3</sub>)<sub>3</sub>), 122.86, 132.52, 136.72, 136.83, 142.13, 176.68 (RuOC). IR (cm<sup>-1</sup>): 2921 (s), 1599 (w), 1567 (w), 1528 (m), 1491 (m), 1414 (m), 1355 (w), 1328 (m), 1285 (m), 1241 (s), 1168 (w), 1055 (s), 884 (w), 825 (w), 780 (w), 710 (w), 616 (w), 495 (s). ESI-MS: *m/z* = 975.4823 (M<sup>+</sup> + H, calcd 975.4835). UV-Vis (CH<sub>2</sub>Cl<sub>2</sub>): λ<sub>max</sub> = 292 nm (ε = 22400 L mol<sup>-1</sup> cm<sup>-1</sup>), 386 nm (11200 L mol<sup>-1</sup> cm<sup>-1</sup>), 492 nm (sh, 6300 L mol<sup>-1</sup> cm<sup>-1</sup>), 594 nm (24100 L mol<sup>-1</sup> cm<sup>-1</sup>). Anal. Calcd for C<sub>56</sub>H<sub>76</sub>N<sub>2</sub>O<sub>6</sub>Ru: C, 69.04; H, 7.86; N, 2.88. Found: C, 68.01; H, 7.80; N, 2.98.

**Bis(2,4,6,8-tetra-*tert*-butyl-1,9-dioxophenoxazinato)osmium, Os(DOPO)<sub>2</sub>.** In the drybox, di-μ-chlorobis[(*p*-cymene)chloroosmium(II)] (0.0580 g, 0.0734 mmol) and Pb(DOPO<sup>Q</sup>)<sub>2</sub> (0.1585 g, 0.1468 mmol, 2.00 equiv per Os dimer) were reacted and worked up as described above for the ruthenium analogue to yield 0.0875 g Os(DOPO)<sub>2</sub> (56%). <sup>1</sup>H NMR (CDCl<sub>3</sub>): δ 1.25, 1.64 (s, 36H each, <sup>t</sup>Bu), 6.31 (s, 4H, ArH). <sup>13</sup>C {<sup>1</sup>H} NMR (CDCl<sub>3</sub>): δ 29.01, 31.05 (C(CH<sub>3</sub>)<sub>3</sub>), 34.05, 34.84 (C(CH<sub>3</sub>)<sub>3</sub>), 123.94, 127.12, 128.58, 132.87, 140.83, 175.03 (OsOC). IR (cm<sup>-1</sup>): 2961 (s), 2850 (m), 1613 (m), 1538 (m), 1497 (m), 1407 (s), 1341 (w), 1291 (m), 1246 (m), 1203 (w), 1099 (w), 1047 (m), 874 (w), 822 (w), 784 (w), 725 (w), 626 (m), 526 (m). ESI-MS: *m/z* = 1065.5367 (M<sup>+</sup> + H, calcd 1065.5396). UV-Vis (CH<sub>2</sub>Cl<sub>2</sub>): λ<sub>max</sub> = 283 nm (ε = 37000 L mol<sup>-1</sup> cm<sup>-1</sup>), 377 nm (14500 L mol<sup>-1</sup> cm<sup>-1</sup>), 491 nm (33400 L mol<sup>-1</sup> cm<sup>-1</sup>), 650 nm (sh, 6200 L mol<sup>-1</sup> cm<sup>-1</sup>). Anal. Calcd for C<sub>56</sub>H<sub>76</sub>N<sub>2</sub>O<sub>6</sub>Os: C, 63.25; H, 7.20; N, 2.63. Found: C, 63.22; H, 7.02; N, 2.34.

**Bis[bis(3,5-di-*tert*-butyl-2-oxyphenyl)amido]ruthenium, Ru(ONO)<sub>2</sub>.** In the drybox, [Ru(*p*-cymene)Cl<sub>2</sub>]<sub>2</sub> (Strem, 0.0599 g, 0.0978 mmol) and lead(II) bis(3,5-di-*tert*-butyl-1,2-quinone-(3,5-di-*tert*-butyl-2-hydroxy-1-phenyl)imine), Pb(ONO<sup>Q</sup>)<sub>2</sub> (0.2046 g, 0.1945 mmol, 2.00 equiv per Ru dimer) were weighed into a 20-mL scintillation vial. The mixture was

dissolved in 5 mL CHCl<sub>3</sub>, resulting in a purple solution. The vial was capped securely, removed from the drybox, and allowed to stand for 24 h at room temperature. The mixture was worked up as described for Ru(DOPO)<sub>2</sub> to yield 0.0917 g Ru(ONO)<sub>2</sub> (50%). <sup>1</sup>H NMR (CDCl<sub>3</sub>): δ 1.19, 1.41 (s, 36H each, <sup>t</sup>Bu), 7.27 (d, 2 Hz, 2H, ArH), 8.01 (d, 2 Hz, 2H, ArH). <sup>13</sup>C{<sup>1</sup>H} NMR (C<sub>6</sub>D<sub>6</sub>): δ 30.23, 31.73 (C(CH<sub>3</sub>)<sub>3</sub>), 35.21, 35.78 (C(CH<sub>3</sub>)<sub>3</sub>), 114.62, 124.86, 140.84, 142.72, 145.47, 177.65 (RuOC). IR (cm<sup>-1</sup>): 2953 (s), 1550 (w), 1463 (m), 1384 (w), 1360 (s), 1304 (m), 1232 (s), 1011 (m), 910 (m), 852 (w), 829 (w), 759(w), 647 (w), 621 (w), 542 (m). ESI-MS: 947.5298 (M<sup>+</sup> + H, calcd 947.5250). UV-Vis (CH<sub>2</sub>Cl<sub>2</sub>) λ<sub>max</sub> = 271 nm (sh, ε = 28600 L mol<sup>-1</sup> cm<sup>-1</sup>), 453 nm (sh, 16300 L mol<sup>-1</sup> cm<sup>-1</sup>), 527 nm (21600 L mol<sup>-1</sup> cm<sup>-1</sup>). Anal. Calcd for C<sub>56</sub>H<sub>80</sub>N<sub>2</sub>O<sub>4</sub>Ru: C, 71.08; H, 8.52; N, 2.96. Found: C, 70.91; H, 8.82; N, 2.67.

**Bis[bis(3,5-di-*tert*-butyl-2-oxyphenyl)amido]osmium, Os(ONO)<sub>2</sub>.** The compound was prepared using the same procedure as the ruthenium analogue using 0.0652 g [Os(*p*-cymene)Cl<sub>2</sub>]<sub>2</sub> (0.0825 mmol) and 0.1690 g Pb(ONO<sup>O</sup>)<sub>2</sub> (0.1607 mmol, 1.95 equiv per Os dimer). Yield 0.0759 g (46%). <sup>1</sup>H NMR (CDCl<sub>3</sub>): δ 1.24, 1.45 (s, 36H each, <sup>t</sup>Bu), 7.05, 8.03 (sl br s, 4H, ArH). <sup>13</sup>C{<sup>1</sup>H} NMR (C<sub>6</sub>D<sub>6</sub>): δ 30.39, 32.29 (C(CH<sub>3</sub>)<sub>3</sub>), 35.23, 35.92 (C(CH<sub>3</sub>)<sub>3</sub>), 113.39 122.87, 139.20, 142.22, 146.04, 173.86 (OsOC). IR (cm<sup>-1</sup>): 2954 (s), 2867 (m), 1461 (m), 1361 (m), 1307 (w), 1234 (m), 1182 (m), 1109 (w), 1051 (w), 1011 (w), 910 (w), 851 (w), 758 (w), 620 (w), 542 (w), 512 (w). ESI-MS: 1037.5829 (M<sup>+</sup> + H, calcd 1037.5810). UV-Vis (CH<sub>2</sub>Cl<sub>2</sub>): λ<sub>max</sub> = 275 nm (sh, ε = 8900 L mol<sup>-1</sup> cm<sup>-1</sup>), 368 (sh, 2800 L mol<sup>-1</sup> cm<sup>-1</sup>), 450 nm (9900 L mol<sup>-1</sup> cm<sup>-1</sup>), 493 nm (9700 L mol<sup>-1</sup> cm<sup>-1</sup>), 583 (sh, 4800 L mol<sup>-1</sup> cm<sup>-1</sup>). Anal. Calcd for C<sub>56</sub>H<sub>80</sub>N<sub>2</sub>O<sub>4</sub>Os: C, 64.96; H, 7.79; N, 2.71. Found: C, 64.66; H, 7.77; N, 2.46.

**Electrochemistry.** Electrochemical measurements were performed in the drybox using a Metrohm Autolab PGSTAT128N potentiostat. A standard three-electrode setup was used, with glassy carbon working and counter electrodes and a silver/silver chloride pseudo-reference

electrode. The electrodes were connected to the potentiostat through electrical conduits in the drybox wall. Samples were 1 mM in CH<sub>2</sub>Cl<sub>2</sub> with 100 mM [Bu<sub>4</sub>N]PF<sub>6</sub> as supporting electrolyte. Potentials were referenced to ferrocene/ferrocenium at 0 V,<sup>S5</sup> with the reference potential established by spiking the solution with a small amount of decamethylferrocene ( $E^{\circ} = -0.565$  V).<sup>S6</sup> Cyclic voltammograms were recorded with a scan rate of 120 mV s<sup>-1</sup>.

**Variable-Temperature NMR.** Variable-temperature <sup>1</sup>H NMR spectra of Os(ONO)<sub>2</sub> and Ru(ONO)<sub>2</sub> were measured on CD<sub>2</sub>Cl<sub>2</sub> solutions on a Varian VXR-500 spectrometer between -80 °C and room temperature. Spectra of Ru(ONO)<sub>2</sub> showed two aromatic and two *tert*-butyl resonances at all temperatures. Spectra of Os(ONO)<sub>2</sub> showed changes consistent with an unsymmetrical structure (four aromatic and four *tert*-butyl peaks) undergoing a dynamic process resulting in exchange of the inequivalent ends of the ONO ligand (Figure S5). The spectral lineshape of the aromatic regions in the temperature range of -40 °C to 10° C was simulated using the program *iNMR* (<http://www.inmr.net>) to determine the rate of exchange. The values of  $\ln(k/T)$  were plotted against  $1/T$  to determine activation parameters for the exchange process (Figure S6).

**Calculations.** Geometry optimizations and orbital calculations used the hybrid B3LYP method, using the Gaussian09 suite of programs.<sup>S7</sup> Second- and third-row metal complexes used an SDD basis set for the metal atoms and a 6-31G\* basis set for all other atoms, while first-row metal complexes used a 6-31G\* basis set for all atoms. Starting geometries were generated from known crystal structures, with all *tert*-butyl groups replaced by hydrogen atoms, and all calculations were performed on singlet states. (Thus, the calculated structure of (ONO)<sub>2</sub>Fe differs substantially from the experimentally determined structure, which corresponds to a quintet.<sup>S8</sup>) Optimized geometries were confirmed to be minima by frequency analysis. For Os(ONO)<sub>2</sub> and [Re(ONO)<sub>2</sub>]<sup>-</sup>, calculations were also performed on complexes constrained to

adopt a  $D_2$ -symmetric geometry; these were not minima, and frequency analysis revealed two imaginary vibrational frequencies in each case. To generate the Walsh diagram for  $[\text{Re}(\text{ONO})_2]^-$  (Figure 5), structures were energy-minimized with the N–Re–N angle constrained to values ranging from  $110^\circ$  to  $180^\circ$  in  $5^\circ$  intervals. Plots of calculated Kohn-Sham orbitals were generated using the program GaussView (v. 5.0.8) with an isovalue of 0.04.

**X-ray Crystallography.** Crystals of  $\text{Ru}(\text{DOPO})_2$  were grown by slow evaporation from  $\text{CDCl}_3$ , while  $\text{Os}(\text{DOPO})_2$  was crystallized by liquid-liquid diffusion of acetonitrile into a chloroform solution of the compound. Crystals of  $\text{Ru}(\text{ONO})_2 \cdot \text{CHCl}_3 \cdot 1.31 \text{ CH}_3\text{CN}$  and  $\text{Os}(\text{ONO})_2 \cdot 2 \text{ CHCl}_3$  were crystallized by vapor diffusion of acetonitrile into chloroform. Crystals were placed in a perfluorinated polyether oil (PPFPE) before being transferred to the cold  $\text{N}_2$  stream of a Bruker Apex II CCD diffractometer in a nylon loop. Data were reduced, correcting for absorption, using the program SADABS. The structures were solved using direct methods. Remaining nonhydrogen atoms were found on difference Fourier maps, and all nonhydrogen atoms were refined anisotropically. Hydrogen atoms were placed in calculated positions, except those in  $\text{Os}(\text{DOPO})_2$ , which were found on difference Fourier maps and refined isotropically. Calculations used SHELXTL (Bruker AXS),<sup>S9</sup> with scattering factors and anomalous dispersion terms taken from the literature.<sup>S10</sup>

In  $\text{Ru}(\text{ONO})_2 \cdot \text{CHCl}_3 \cdot 1.31 \text{ CH}_3\text{CN}$ , two lattice acetonitriles and one chloroform in the asymmetric unit (which contained two metal complexes) were ordered. However, one region of solvent consisted of a disordered chloroform molecule next to a partially occupied acetonitrile, with one component of the disordered chloroform closer than van der Waals contact to the  $\text{CH}_3\text{CN}$ . This was modeled by allowing the occupancy of the minor component of the  $\text{CHCl}_3$  to vary, with the occupancy of the acetonitrile set to the occupancy of the major (distant) component of the  $\text{CHCl}_3$ . The thermal parameters of the corresponding atoms in the two  $\text{CHCl}_3$

sites were constrained to be equal. Two of the chlorine atoms were very close and were refined with identical coordinates. The site occupancy factor of the major component refined to 0.620(3), and was then fixed at 0.62 for the final refinement cycles. At this stage the  $x$ ,  $y$ ,  $z$  coordinates and thermal parameters of the two  $\text{CHCl}_3$  components were allowed to vary independently, except that the spatially close chlorines (Cl5/Cl59 and Cl6/Cl69) were constrained to have equal thermal parameters.

$\text{Os}(\text{ONO})_2 \cdot 2 \text{CHCl}_3$  forms a structure containing alternating layers of metal complexes (two molecules per asymmetric unit) and of chloroform molecules perpendicular to the  $a$  axis. One chloroform is ordered in the metal-containing layers and was modeled explicitly. The chloroform in the solvent layers was severely disordered and was treated using the SQUEEZE routine<sup>S11</sup> in the program PLATON.<sup>S12</sup> A total of 3546 Å<sup>3</sup> of solvent-accessible void space, containing 1470 electrons, was detected per unit cell. This corresponds within 6% to the amount expected from 24 chloroform molecules per unit cell, corresponding to an overall formula of  $\text{Os}(\text{ONO})_2 \cdot 2 \text{CHCl}_3$ .

Further details may be found in Tables S1 and S2. Thermal ellipsoid plots of the DOPO compounds are given in Figure S1. Plots of overlays of the geometries of the crystallographically inequivalent complexes in  $\text{Ru}(\text{ONO})_2 \cdot \text{CHCl}_3 \cdot 1.31 \text{CH}_3\text{CN}$  and in  $\text{Os}(\text{ONO})_2 \cdot 2 \text{CHCl}_3$  are shown in Figure S2. Summaries of bond distances and angles are given in Tables S3 and S4. In these tables, distances and angles are the averages of the two or four crystallographically inequivalent examples of each present in the crystal structures.

**Table S1.** Crystal data for Ru(DOPO)<sub>2</sub> and Os(DOPO)<sub>2</sub>.

|                                                               | Ru(DOPO) <sub>2</sub>                                            | Os(DOPO) <sub>2</sub>                                            |
|---------------------------------------------------------------|------------------------------------------------------------------|------------------------------------------------------------------|
| Molecular formula                                             | C <sub>56</sub> H <sub>76</sub> N <sub>2</sub> O <sub>6</sub> Ru | C <sub>56</sub> H <sub>76</sub> N <sub>2</sub> O <sub>6</sub> Os |
| Formula weight                                                | 974.25                                                           | 1063.38                                                          |
| <i>T</i> /K                                                   | 120(2)                                                           | 120(2)                                                           |
| Crystal system                                                | Monoclinic                                                       | Monoclinic                                                       |
| Space group                                                   | <i>P</i> 2 <sub>1</sub> / <i>c</i>                               | <i>P</i> 2 <sub>1</sub> / <i>c</i>                               |
| $\lambda/\text{\AA}$                                          | 0.71073 (Mo K $\alpha$ )                                         | 0.71073 (Mo K $\alpha$ )                                         |
| Total data collected                                          | 149553                                                           | 117301                                                           |
| No. of indep. reflns.                                         | 11697                                                            | 10557                                                            |
| <i>R</i> <sub>int</sub>                                       | 0.0853                                                           | 0.0739                                                           |
| Obsd refls [ <i>I</i> > 2 $\sigma$ ( <i>I</i> )]              | 8809                                                             | 9028                                                             |
| <i>a</i> / $\text{\AA}$                                       | 20.3495(11)                                                      | 20.4119(19)                                                      |
| <i>b</i> / $\text{\AA}$                                       | 19.7245(11)                                                      | 19.7938(19)                                                      |
| <i>c</i> / $\text{\AA}$                                       | 12.9833(7)                                                       | 13.0487(12)                                                      |
| $\alpha/^\circ$                                               | 90                                                               | 90                                                               |
| $\beta/^\circ$                                                | 90.575(2)                                                        | 90.3740(15)                                                      |
| $\gamma/^\circ$                                               | 90                                                               | 90                                                               |
| <i>V</i> / $\text{\AA}^3$                                     | 5211.0(5)                                                        | 5271.9(9)                                                        |
| <i>Z</i>                                                      | 4                                                                | 4                                                                |
| $\mu/\text{mm}^{-1}$                                          | 0.350                                                            | 2.468                                                            |
| Crystal size/mm                                               | 0.249 × 0.098 × 0.051                                            | 0.152 × 0.147 × 0.146                                            |
| No. refined parameters                                        | 586                                                              | 890                                                              |
| <i>R</i> 1, <i>wR</i> 2 [ <i>I</i> > 2 $\sigma$ ( <i>I</i> )] | 0.0378, 0.0843                                                   | 0.0246, 0.0536                                                   |
| <i>R</i> 1, <i>wR</i> 2 [all data]                            | 0.0629, 0.0951                                                   | 0.0331, 0.0568                                                   |
| Goodness of fit                                               | 1.026                                                            | 1.030                                                            |



**Table S2.** Crystal data for Ru(ONO)<sub>2</sub>•CHCl<sub>3</sub>•1.31 CH<sub>3</sub>CN and Os(ONO)<sub>2</sub>•2 CHCl<sub>3</sub>.

|                                                               | Ru(ONO) <sub>2</sub> •CHCl <sub>3</sub> •1.31 CH <sub>3</sub> CN                          | Os(ONO) <sub>2</sub> •2 CHCl <sub>3</sub>                                        |
|---------------------------------------------------------------|-------------------------------------------------------------------------------------------|----------------------------------------------------------------------------------|
| Molecular formula                                             | C <sub>59.62</sub> H <sub>84.93</sub> Cl <sub>3</sub> N <sub>3.31</sub> O <sub>4</sub> Ru | C <sub>58</sub> H <sub>82</sub> Cl <sub>6</sub> N <sub>2</sub> O <sub>4</sub> Os |
| Formula weight                                                | 1119.43                                                                                   | 1274.15                                                                          |
| <i>T</i> /K                                                   | 120(2)                                                                                    | 120(2)                                                                           |
| Crystal system                                                | Monoclinic                                                                                | Monoclinic                                                                       |
| Space group                                                   | <i>P</i> 2 <sub>1</sub> / <i>c</i>                                                        | <i>C</i> 2/ <i>c</i>                                                             |
| $\lambda/\text{\AA}$                                          | 0.71073 (Mo K $\alpha$ )                                                                  | 1.54178 (Cu K $\alpha$ )                                                         |
| Total data collected                                          | 215109                                                                                    | 238998                                                                           |
| No. of indep. reflns.                                         | 30196                                                                                     | 23772                                                                            |
| <i>R</i> <sub>int</sub>                                       | 0.0457                                                                                    | 0.0698                                                                           |
| Obsd refls [ <i>I</i> > 2 $\sigma$ ( <i>I</i> )]              | 25253                                                                                     | 20325                                                                            |
| <i>a</i> / $\text{\AA}$                                       | 14.2714(16)                                                                               | 59.4673(19)                                                                      |
| <i>b</i> / $\text{\AA}$                                       | 20.573(2)                                                                                 | 21.5249(6)                                                                       |
| <i>c</i> / $\text{\AA}$                                       | 41.187(5)                                                                                 | 19.0986(5)                                                                       |
| $\alpha/^\circ$                                               | 90                                                                                        | 90                                                                               |
| $\beta/^\circ$                                                | 93.0881(17)                                                                               | 95.211(3)                                                                        |
| $\gamma/^\circ$                                               | 90                                                                                        | 90                                                                               |
| <i>V</i> / $\text{\AA}^3$                                     | 12075(2)                                                                                  | 24345.7(12)                                                                      |
| <i>Z</i>                                                      | 8                                                                                         | 16                                                                               |
| $\mu/\text{mm}^{-1}$                                          | 0.438                                                                                     | 6.721                                                                            |
| Crystal size/mm                                               | 0.352 × 0.184 × 0.180                                                                     | 0.161 × 0.037 × 0.018                                                            |
| No. refined parameters                                        | 1315                                                                                      | 1171                                                                             |
| <i>R</i> 1, <i>wR</i> 2 [ <i>I</i> > 2 $\sigma$ ( <i>I</i> )] | 0.0478, 0.1229                                                                            | 0.0595, 0.1458                                                                   |
| <i>R</i> 1, <i>wR</i> 2 [all data]                            | 0.0598, 0.1310                                                                            | 0.0689, 0.1506                                                                   |
| Goodness of fit                                               | 1.034                                                                                     | 1.055                                                                            |

**Figure S1.** Thermal ellipsoid plot of (a) Ru(DOPO)<sub>2</sub> and (b) Os(DOPO)<sub>2</sub>. Hydrogen atoms are omitted for clarity.

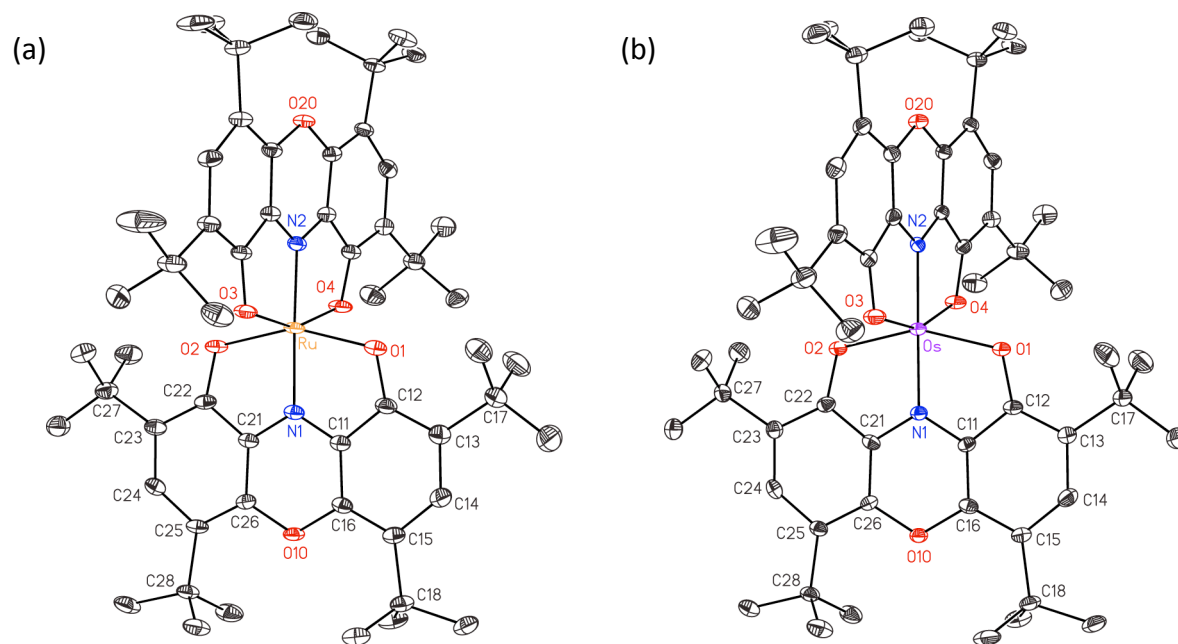

**Figure S2.** Overlays of the two crystallographically inequivalent metal complexes in the structures of (a)  $\text{Ru}(\text{ONO})_2 \cdot \text{CHCl}_3 \cdot 1.31 \text{ CH}_3\text{CN}$  and (b)  $\text{Os}(\text{ONO})_2 \cdot 2 \text{ CHCl}_3$ . Hydrogen atoms and *tert*-butyl groups are omitted for clarity. Numbering scheme is given for molecule 1 (solid pink lines); molecule 2 is given by blue dashed lines.

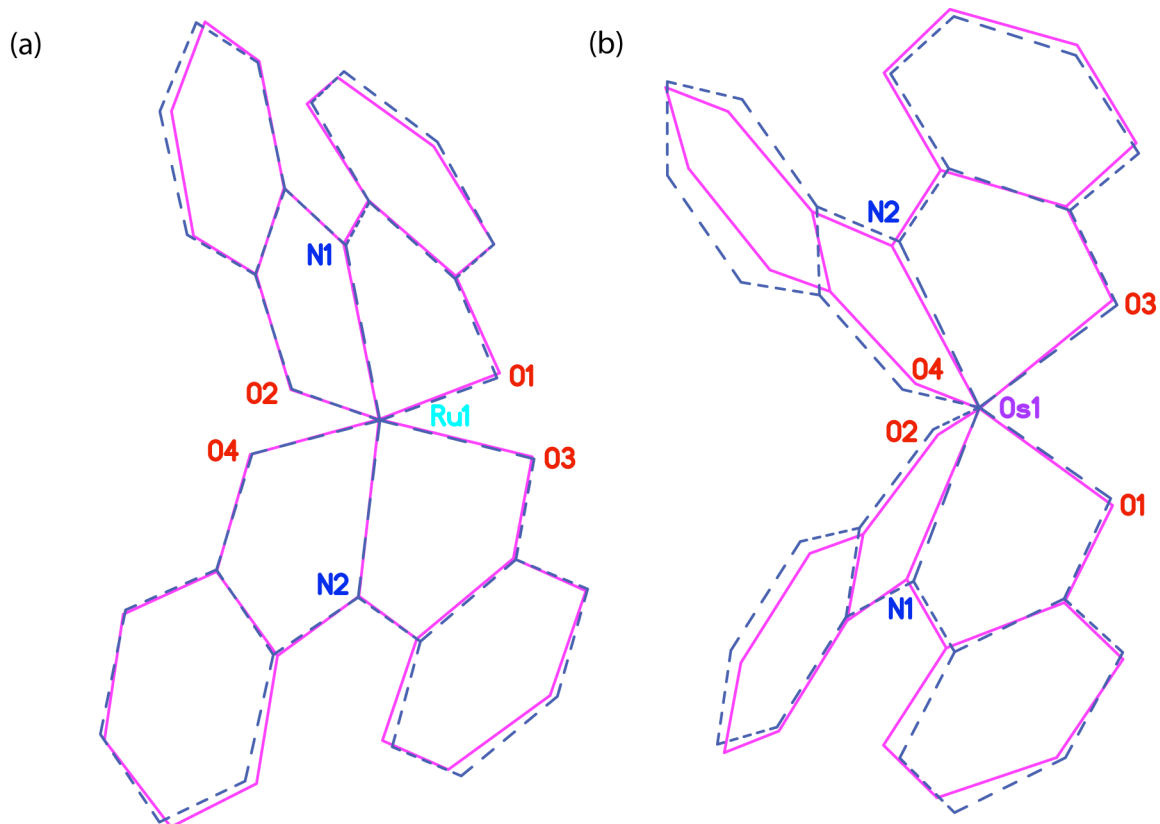

**Table S3.** Selected bond distances (Å), angles (deg), and metrical oxidation state (MOS) for Ru(DOPO)<sub>2</sub> and Os(DOPO)<sub>2</sub>. Values given in Roman type are the averages over all chemically equivalent values from the crystal structures. Values given in italics are from DFT calculations.

| Parameter                      | Ru(DOPO) <sub>2</sub>         | Os(DOPO) <sub>2</sub>         |
|--------------------------------|-------------------------------|-------------------------------|
| M–O                            | 2.076(7)<br><i>2.150</i>      | 2.064(8)<br><i>2.140</i>      |
| M–N                            | 1.9173(18)<br><i>1.938</i>    | 1.925(5)<br><i>1.945</i>      |
| C1–N                           | 1.342(4)<br><i>1.342</i>      | 1.358(4)<br><i>1.353</i>      |
| C2–O                           | 1.314(4)<br><i>1.302</i>      | 1.333(4)<br><i>1.313</i>      |
| C1–C2                          | 1.412(4)<br><i>1.431</i>      | 1.403(4)<br><i>1.422</i>      |
| C2–C3                          | 1.407(6)<br><i>1.416</i>      | 1.404(4)<br><i>1.411</i>      |
| C3–C4                          | 1.390(3)<br><i>1.393</i>      | 1.396(5)<br><i>1.396</i>      |
| C4–C5                          | 1.416(5)<br><i>1.420</i>      | 1.411(6)<br><i>1.416</i>      |
| C5–C6                          | 1.381(5)<br><i>1.380</i>      | 1.390(4)<br><i>1.383</i>      |
| C1–C6                          | 1.403(5)<br><i>1.412</i>      | 1.398(4)<br><i>1.406</i>      |
|                                |                               |                               |
| N–M–N                          | 177.13(8)<br><i>180.0</i>     | 176.41(9)<br><i>180.0</i>     |
| O–M–O ( <i>cis</i> )           | 93(5)<br><i>92.8</i>          | 93(6)<br><i>93.0</i>          |
| O–M–O ( <i>trans</i> )         | 155.78(9)<br><i>154.7</i>     | 154.62(11)<br><i>153.4</i>    |
| N–M–O (intraligand)            | 77.9(4)<br><i>77.3</i>        | 77.3(2)<br><i>76.7</i>        |
| N–M–O (interligand)            | 102(3)<br><i>102.7</i>        | 103(3)<br><i>103.3</i>        |
|                                |                               |                               |
| Metrical Oxidation State (MOS) | –1.99(20)<br><i>–1.74(16)</i> | –2.35(18)<br><i>–2.00(15)</i> |

**Table S4.** Selected bond distances (Å), metrical oxidation states (MOS), and angles (deg) for Ru(ONO)<sub>2</sub> and Os(ONO)<sub>2</sub>. Values given in Roman type are the averages over all chemically equivalent values from the crystal structures of Ru(ONO)<sub>2</sub>•CHCl<sub>3</sub>•1.31 CH<sub>3</sub>CN and Os(ONO)<sub>2</sub>•2 CHCl<sub>3</sub>, respectively. Values given in italics are from DFT calculations. “Ring 1” refers to the odd-numbered rings (e.g., those containing C11, C32, etc.) in the crystal structures, while “Ring 2” refers to the even-numbered rings.

| Parameter                                       | Ru(ONO) <sub>2</sub>         |                              | Os(ONO) <sub>2</sub>          |                              |
|-------------------------------------------------|------------------------------|------------------------------|-------------------------------|------------------------------|
|                                                 | Ring 1                       | Ring 2                       | Ring 1                        | Ring 2                       |
| M–O                                             | 2.023(6)<br><i>2.060</i>     | 1.988(8)<br><i>2.026</i>     | 1.975(11)<br><i>2.026</i>     | 1.954(8)<br><i>1.994</i>     |
| M–N                                             | 1.951(4)<br><i>1.986</i>     |                              | 1.974(8)<br><i>1.993</i>      |                              |
| C1–N                                            | 1.392(6)<br><i>1.384</i>     | 1.373(3)<br><i>1.372</i>     | 1.403(8)<br><i>1.398</i>      | 1.393(10)<br><i>1.398</i>    |
| C2–O                                            | 1.334(4)<br><i>1.307</i>     | 1.321(5)<br><i>1.305</i>     | 1.347(9)<br><i>1.333</i>      | 1.350(8)<br><i>1.333</i>     |
| C1–C2                                           | 1.425(3)<br><i>1.442</i>     | 1.422(5)<br><i>1.441</i>     | 1.418(12)<br><i>1.426</i>     | 1.401(8)<br><i>1.421</i>     |
| C2–C3                                           | 1.418(5)<br><i>1.415</i>     | 1.425(4)<br><i>1.416</i>     | 1.409(13)<br><i>1.403</i>     | 1.411(8)<br><i>1.402</i>     |
| C3–C4                                           | 1.389(6)<br><i>1.382</i>     | 1.379(5)<br><i>1.379</i>     | 1.392(19)<br><i>1.389</i>     | 1.385(8)<br><i>1.388</i>     |
| C4–C5                                           | 1.410(9)<br><i>1.414</i>     | 1.426(4)<br><i>1.417</i>     | 1.414(16)<br><i>1.406</i>     | 1.416(10)<br><i>1.408</i>    |
| C5–C6                                           | 1.384(5)<br><i>1.383</i>     | 1.374(4)<br><i>1.380</i>     | 1.376(10)<br><i>1.390</i>     | 1.385(11)<br><i>1.388</i>    |
| C1–C6                                           | 1.402(6)<br><i>1.415</i>     | 1.411(4)<br><i>1.419</i>     | 1.390(11)<br><i>1.406</i>     | 1.394(8)<br><i>1.409</i>     |
| N–M–N                                           | 162.05(13)<br><i>166.4</i>   |                              | 131(3)<br><i>154.0</i>        |                              |
| O(1)–M–O(2)<br>(intraligand)                    | 154.1(8)<br><i>155.7</i>     |                              | 124(3)<br><i>142.0</i>        |                              |
| O( <i>n</i> )–M–O( <i>n'</i> )<br>(interligand) | 84.5(7)<br><i>84.1</i>       | 106.50(9)<br><i>103.4</i>    | 87.1(6)<br><i>82.9</i>        | 144(4)<br><i>124.3</i>       |
| O(1)–M–O(2')<br>(interligand)                   | 89.2(11)<br><i>90.5</i>      |                              | 83.6(5)<br><i>84.9</i>        |                              |
| N–M–O<br>(intraligand)                          | 80.05(18)<br><i>80.0</i>     | 79.66(17)<br><i>79.9</i>     | 78.3(2)<br><i>78.3</i>        | 77.9(3)<br><i>78.3</i>       |
| N–M–O<br>(interligand)                          | 113.8(4)<br><i>110.5</i>     | 89.6(5)<br><i>91.7</i>       | 144(3)<br><i>122.7</i>        | 87.3(11)<br><i>89.5</i>      |
| Metrical Oxidation State (MOS)                  | –2.33(8)<br><i>–1.94(12)</i> | –1.97(10)<br><i>–1.81(9)</i> | –2.56(12)<br><i>–2.44(10)</i> | –2.59(14)<br><i>–2.38(7)</i> |

**Figure S3.** Optical spectra of Ru(DOPO)<sub>2</sub>, Os(DOPO)<sub>2</sub>, Ru(ONO)<sub>2</sub> and Os(ONO)<sub>2</sub> (CH<sub>2</sub>Cl<sub>2</sub> solution).

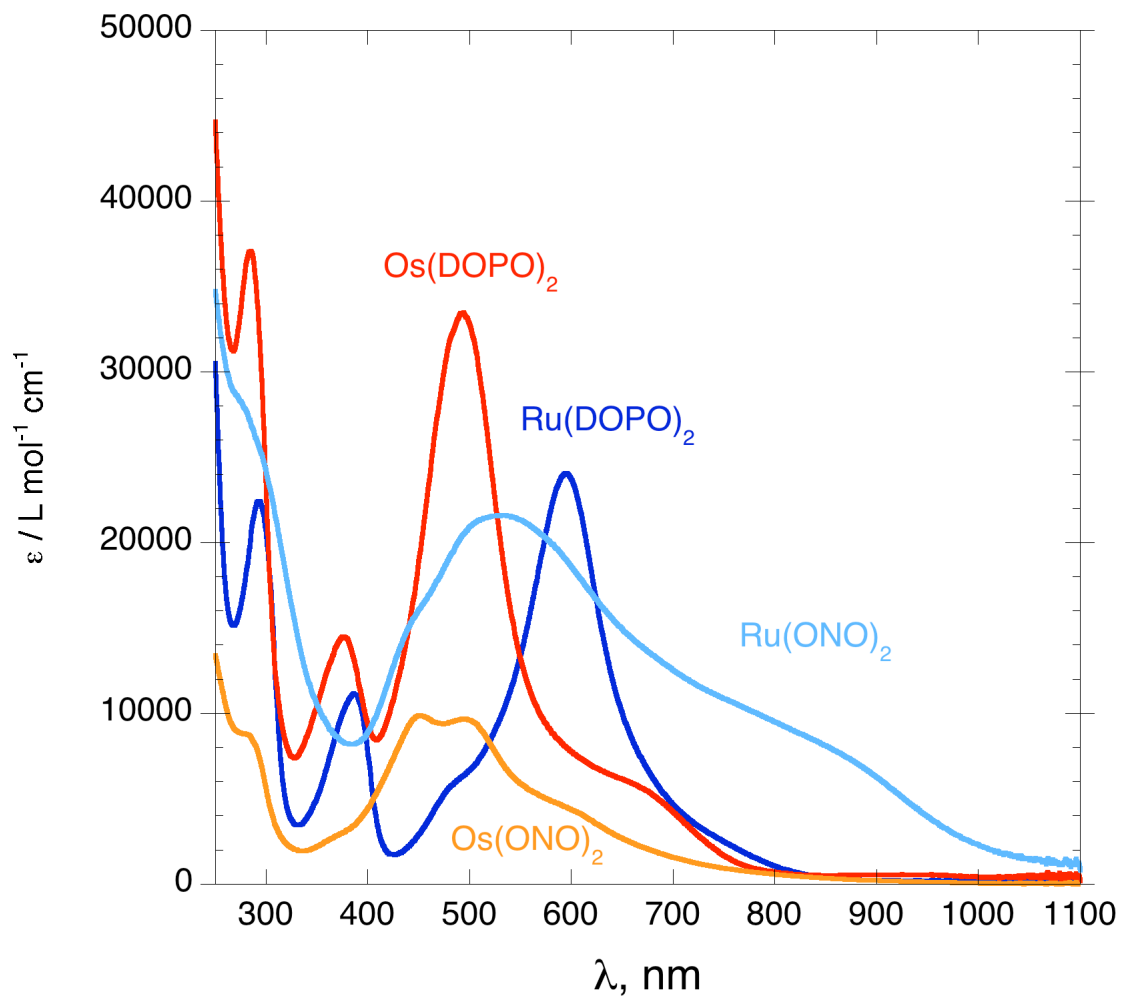

**Figure S4.** Cyclic voltammograms ( $\text{CH}_2\text{Cl}_2$ , 1 mM analyte, 100 mM  $[\text{Bu}_4\text{N}]\text{PF}_6$  supporting electrolyte, scan rate  $120 \text{ mV s}^{-1}$ ) of  $\text{Ru}(\text{DOPO})_2$ ,  $\text{Os}(\text{DOPO})_2$ ,  $\text{Ru}(\text{ONO})_2$  and  $\text{Os}(\text{ONO})_2$ .

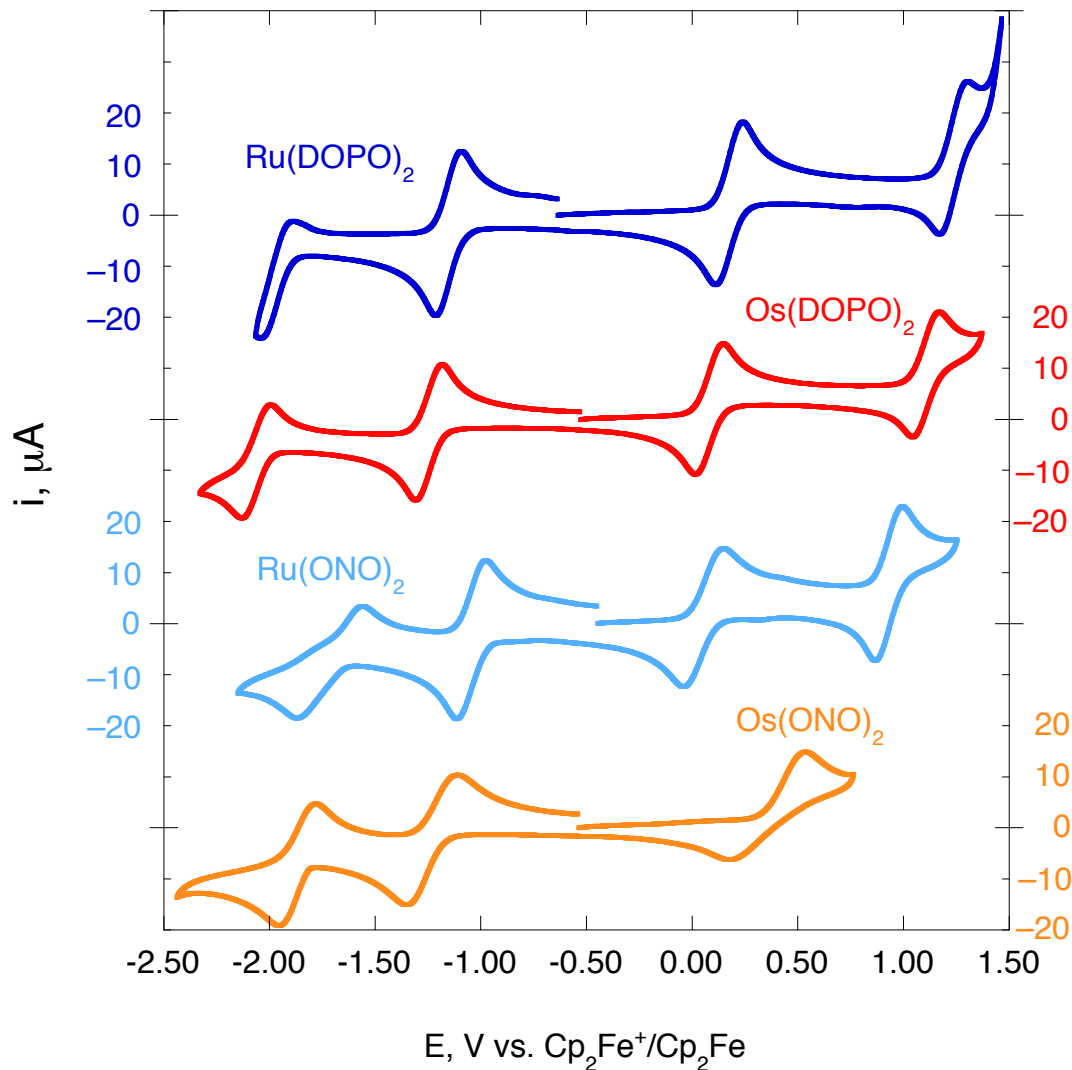

**Table S5.** Redox potentials of  $\text{Ru}(\text{DOPO})_2$ ,  $\text{Os}(\text{DOPO})_2$ ,  $\text{Ru}(\text{ONO})_2$  and  $\text{Os}(\text{ONO})_2$  (V vs.  $\text{Cp}_2\text{Fe}^+/\text{Cp}_2\text{Fe}$ ).

| Compound                   | $E^\circ_1$ (2d reduction) | $E^\circ_2$ (1st reduction) | $E^\circ_3$ (1st oxidation) | $E^\circ_4$ (2d oxidation) |
|----------------------------|----------------------------|-----------------------------|-----------------------------|----------------------------|
| $\text{Ru}(\text{DOPO})_2$ | -1.965                     | -1.154                      | 0.176                       | 1.237                      |
| $\text{Os}(\text{DOPO})_2$ | -2.063                     | -1.246                      | 0.081                       | 1.106                      |
| $\text{Ru}(\text{ONO})_2$  | -1.714                     | -1.047                      | 0.055                       | 0.930                      |
| $\text{Os}(\text{ONO})_2$  | -1.868                     | -1.231                      | 0.358                       | 0.852 <sup>a</sup>         |

<sup>a</sup>Redox wave is partially irreversible.

**Figure S5.** Variable-temperature  $^1\text{H}$  NMR spectra of  $\text{Os}(\text{ONO})_2$  ( $\delta$  6.0 – 8.5 ppm,  $\text{CD}_2\text{Cl}_2$ , 500 MHz).

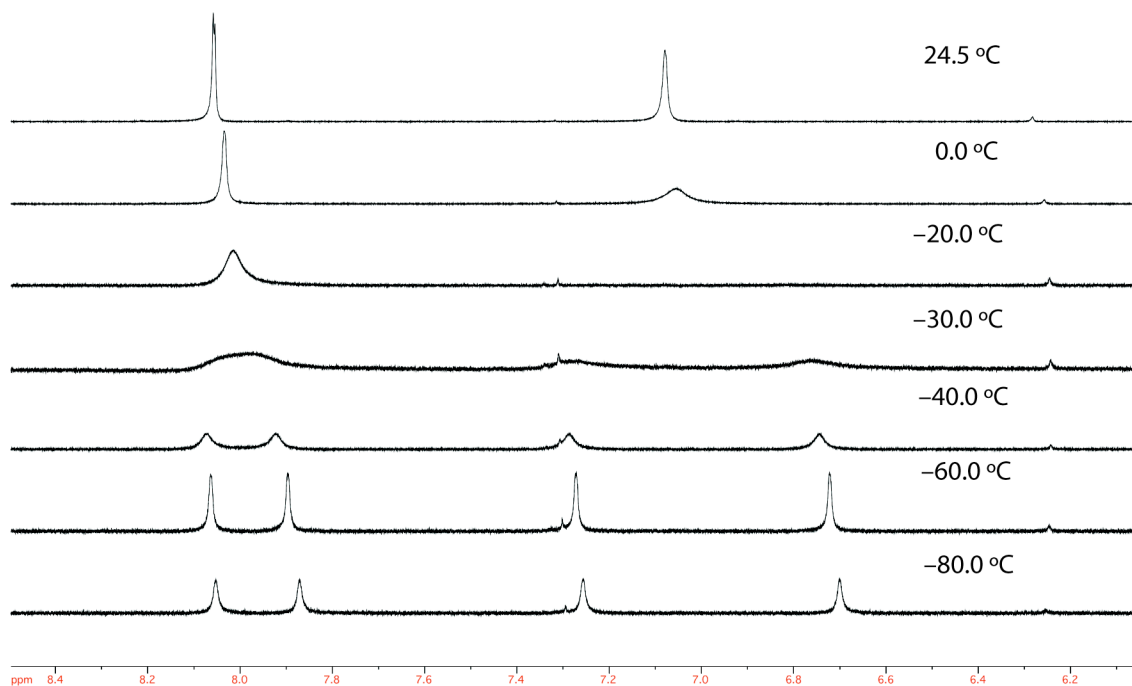

**Figure S6.** Eyring plot of symmetrization reaction of  $\text{Os}(\text{ONO})_2$  ( $\text{CD}_2\text{Cl}_2$ ,  $-40^\circ\text{C}$  to  $10^\circ\text{C}$ ).

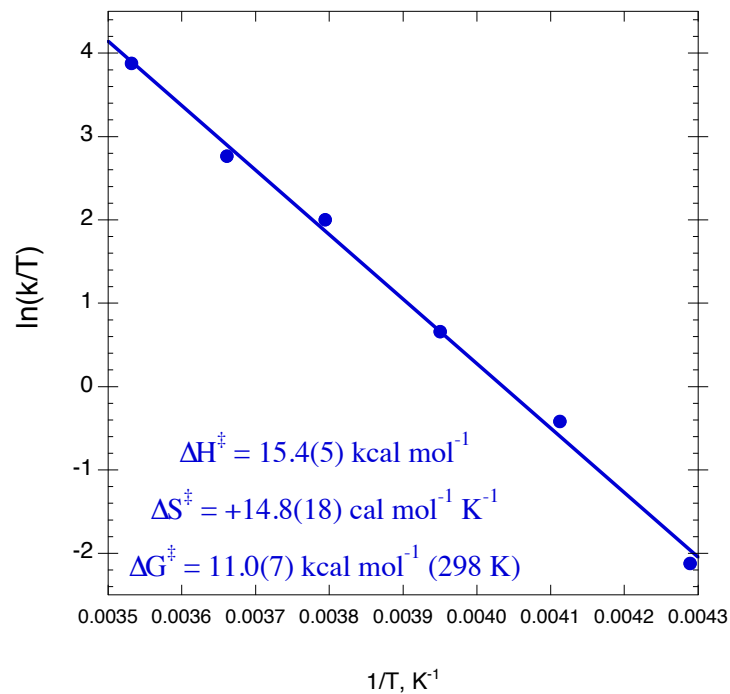



**DFT Calculations****(a) Fe(ONO)<sub>2</sub>**

Energy of optimized structure = -2598.26989830 a.u.

Cartesian coordinates of the optimized structure:

| Centre<br>Number | Atomic<br>Number | Coordinates (Angstroms) |           |           |
|------------------|------------------|-------------------------|-----------|-----------|
|                  |                  | X                       | Y         | Z         |
| 1                | 26               | -0.000039               | -0.000054 | -0.000127 |
| 2                | 7                | 1.889094                | 0.000148  | -0.000009 |
| 3                | 7                | -1.889208               | -0.000172 | -0.000037 |
| 4                | 8                | 0.215431                | 1.381371  | 1.348911  |
| 5                | 6                | 2.456733                | 0.998650  | 0.729630  |
| 6                | 6                | 1.444170                | 1.725792  | 1.478709  |
| 7                | 6                | 1.859264                | 2.783187  | 2.341790  |
| 8                | 1                | 1.098939                | 3.305359  | 2.913282  |
| 9                | 6                | 3.188436                | 3.123343  | 2.409567  |
| 10               | 1                | 3.500908                | 3.937400  | 3.058896  |
| 11               | 6                | 4.170315                | 2.452580  | 1.626263  |
| 12               | 1                | 5.203816                | 2.782380  | 1.667943  |
| 13               | 6                | 3.816290                | 1.409972  | 0.801886  |
| 14               | 1                | 4.564899                | 0.948038  | 0.172250  |
| 15               | 8                | 0.215863                | -1.381160 | -1.349389 |
| 16               | 6                | 2.456987                | -0.998291 | -0.729520 |
| 17               | 6                | 1.444666                | -1.725474 | -1.478893 |
| 18               | 6                | 1.860063                | -2.782780 | -2.341940 |
| 19               | 1                | 1.099924                | -3.304973 | -2.913659 |
| 20               | 6                | 3.189276                | -3.122840 | -2.409386 |
| 21               | 1                | 3.501977                | -3.936838 | -3.058680 |
| 22               | 6                | 4.170904                | -2.452053 | -1.625785 |
| 23               | 1                | 5.204439                | -2.781779 | -1.667214 |
| 24               | 6                | 3.816595                | -1.409512 | -0.801448 |
| 25               | 1                | 4.565011                | -0.947560 | -0.171595 |
| 26               | 8                | -0.215490               | -1.381329 | 1.348795  |
| 27               | 6                | -2.456827               | -0.998693 | 0.729570  |
| 28               | 6                | -1.444225               | -1.725799 | 1.478621  |
| 29               | 6                | -1.859257               | -2.783204 | 2.341712  |
| 30               | 1                | -1.098903               | -3.305352 | 2.913187  |
| 31               | 6                | -3.188420               | -3.123403 | 2.409518  |
| 32               | 1                | -3.500851               | -3.937470 | 3.058855  |
| 33               | 6                | -4.170342               | -2.452664 | 1.626247  |
| 34               | 1                | -5.203835               | -2.782485 | 1.667968  |
| 35               | 6                | -3.816374               | -1.410040 | 0.801865  |
| 36               | 1                | -4.565014               | -0.948104 | 0.172266  |
| 37               | 8                | -0.215813               | 1.381170  | -1.349184 |
| 38               | 6                | -2.457013               | 0.998318  | -0.729549 |
| 39               | 6                | -1.444600               | 1.725510  | -1.478792 |
| 40               | 6                | -1.859895               | 2.782867  | -2.341822 |
| 41               | 1                | -1.099695               | 3.305073  | -2.913448 |
| 42               | 6                | -3.189096               | 3.122962  | -2.409370 |
| 43               | 1                | -3.501716               | 3.937001  | -3.058651 |
| 44               | 6                | -4.170815               | 2.452160  | -1.625898 |
| 45               | 1                | -5.204340               | 2.781906  | -1.667415 |
| 46               | 6                | -3.816603               | 1.409571  | -0.801577 |
| 47               | 1                | -4.565084               | 0.947592  | -0.171819 |

(b)  $[\text{Co}(\text{ONO})_2]^+$ 

Energy of optimized structure = -2717.10314636 a.u.

Cartesian coordinates of the optimized structure:

| Centre<br>Number | Atomic<br>Number | Coordinates (Angstroms) |           |           |
|------------------|------------------|-------------------------|-----------|-----------|
|                  |                  | X                       | Y         | Z         |
| 1                | 27               | 0.000000                | 0.000000  | 0.000000  |
| 2                | 7                | -1.899134               | 0.000000  | -0.000001 |
| 3                | 7                | 1.899135                | 0.000000  | 0.000000  |
| 4                | 8                | -0.130748               | 1.334200  | 1.332992  |
| 5                | 8                | -0.130747               | -1.334199 | -1.332993 |
| 6                | 8                | 0.130748                | 1.334217  | -1.332975 |
| 7                | 8                | 0.130747                | -1.334216 | 1.332975  |
| 8                | 6                | -2.417194               | 0.933402  | 0.823313  |
| 9                | 6                | -1.363173               | 1.635924  | 1.555829  |
| 10               | 6                | -1.725834               | 2.632861  | 2.504457  |
| 11               | 1                | -0.935941               | 3.135958  | 3.051074  |
| 12               | 6                | -3.051280               | 2.932865  | 2.687216  |
| 13               | 1                | -3.332368               | 3.697976  | 3.405193  |
| 14               | 6                | -4.083313               | 2.275992  | 1.944054  |
| 15               | 1                | -5.116141               | 2.567829  | 2.102472  |
| 16               | 6                | -3.782534               | 1.299154  | 1.033384  |
| 17               | 1                | -4.574644               | 0.838338  | 0.460613  |
| 18               | 6                | -2.417194               | -0.933402 | -0.823314 |
| 19               | 6                | -1.363172               | -1.635924 | -1.555830 |
| 20               | 6                | -1.725833               | -2.632861 | -2.504458 |
| 21               | 1                | -0.935940               | -3.135958 | -3.051074 |
| 22               | 6                | -3.051278               | -2.932866 | -2.687216 |
| 23               | 1                | -3.332366               | -3.697976 | -3.405194 |
| 24               | 6                | -4.083312               | -2.275993 | -1.944055 |
| 25               | 1                | -5.116139               | -2.567830 | -2.102473 |
| 26               | 6                | -3.782533               | -1.299155 | -1.033385 |
| 27               | 1                | -4.574643               | -0.838338 | -0.460614 |
| 28               | 6                | 2.417196                | 0.933407  | -0.823309 |
| 29               | 6                | 1.363173                | 1.635939  | -1.555813 |
| 30               | 6                | 1.725833                | 2.632886  | -2.504432 |
| 31               | 1                | 0.935938                | 3.135992  | -3.051039 |
| 32               | 6                | 3.051278                | 2.932887  | -2.687195 |
| 33               | 1                | 3.332365                | 3.698004  | -3.405166 |
| 34               | 6                | 4.083313                | 2.276000  | -1.944048 |
| 35               | 1                | 5.116141                | 2.567832  | -2.102471 |
| 36               | 6                | 3.782536                | 1.299154  | -1.033386 |
| 37               | 1                | 4.574648                | 0.838325  | -0.460629 |
| 38               | 6                | 2.417195                | -0.933407 | 0.823310  |
| 39               | 6                | 1.363172                | -1.635939 | 1.555814  |
| 40               | 6                | 1.725830                | -2.632886 | 2.504433  |
| 41               | 1                | 0.935935                | -3.135991 | 3.051039  |
| 42               | 6                | 3.051275                | -2.932888 | 2.687196  |
| 43               | 1                | 3.332362                | -3.698005 | 3.405167  |
| 44               | 6                | 4.083311                | -2.276001 | 1.944050  |
| 45               | 1                | 5.116139                | -2.567834 | 2.102473  |
| 46               | 6                | 3.782535                | -1.299155 | 1.033388  |
| 47               | 1                | 4.574648                | -0.838327 | 0.460631  |

(c)  $[\text{Tc}(\text{ONO})_2]^-$ 

Energy of optimized structure = -1415.60087072 a.u.

Cartesian coordinates of the optimized structure:

| Centre<br>Number | Atomic<br>Number | Coordinates (Angstroms) |           |           |
|------------------|------------------|-------------------------|-----------|-----------|
|                  |                  | X                       | Y         | Z         |
| 1                | 43               | 0.000048                | 0.000063  | -0.478584 |
| 2                | 7                | -1.877418               | -0.435124 | 0.116132  |
| 3                | 7                | 1.877603                | 0.435420  | 0.115747  |
| 4                | 8                | 0.196352                | -1.796471 | 0.369847  |
| 5                | 6                | -2.077047               | -1.574634 | 0.874989  |
| 6                | 6                | -0.858764               | -2.297136 | 1.010330  |
| 7                | 6                | -0.810577               | -3.486550 | 1.747025  |
| 8                | 1                | 0.138332                | -4.007574 | 1.837550  |
| 9                | 6                | -1.980862               | -3.981273 | 2.322378  |
| 10               | 1                | -1.951595               | -4.906921 | 2.892836  |
| 11               | 6                | -3.193920               | -3.299649 | 2.156304  |
| 12               | 1                | -4.106356               | -3.702639 | 2.590049  |
| 13               | 6                | -3.251965               | -2.105214 | 1.436357  |
| 14               | 1                | -4.204424               | -1.610195 | 1.293477  |
| 15               | 8                | -1.120584               | 0.750663  | -1.993161 |
| 16               | 6                | -2.822568               | 0.456631  | -0.395954 |
| 17               | 6                | -2.332596               | 1.101205  | -1.571450 |
| 18               | 6                | -3.145997               | 2.020452  | -2.251412 |
| 19               | 1                | -2.758328               | 2.493219  | -3.149463 |
| 20               | 6                | -4.418157               | 2.312260  | -1.761561 |
| 21               | 1                | -5.045645               | 3.028046  | -2.288778 |
| 22               | 6                | -4.887017               | 1.707310  | -0.588151 |
| 23               | 1                | -5.869013               | 1.963646  | -0.197451 |
| 24               | 6                | -4.093483               | 0.785313  | 0.098049  |
| 25               | 1                | -4.446812               | 0.359712  | 1.030162  |
| 26               | 8                | 1.120363                | -0.751117 | -1.992964 |
| 27               | 6                | 2.822621                | -0.456632 | -0.396075 |
| 28               | 6                | 2.332396                | -1.101611 | -1.571276 |
| 29               | 6                | 3.145588                | -2.021189 | -2.251034 |
| 30               | 1                | 2.757712                | -2.494241 | -3.148850 |
| 31               | 6                | 4.417793                | -2.312961 | -1.761273 |
| 32               | 1                | 5.045122                | -3.029015 | -2.288320 |
| 33               | 6                | 4.886904                | -1.707614 | -0.588180 |
| 34               | 1                | 5.868945                | -1.963896 | -0.197550 |
| 35               | 6                | 4.093593                | -0.785263 | 0.097813  |
| 36               | 1                | 4.447172                | -0.359378 | 1.029668  |
| 37               | 8                | -0.196288               | 1.796614  | 0.369692  |
| 38               | 6                | 2.077216                | 1.574935  | 0.874602  |
| 39               | 6                | 0.858869                | 2.297386  | 1.010012  |
| 40               | 6                | 0.810650                | 3.486786  | 1.746732  |
| 41               | 1                | -0.138286               | 4.007751  | 1.837315  |
| 42               | 6                | 1.980928                | 3.981569  | 2.322030  |
| 43               | 1                | 1.951633                | 4.907213  | 2.892498  |
| 44               | 6                | 3.194019                | 3.300007  | 2.155914  |
| 45               | 1                | 4.106448                | 3.703048  | 2.589630  |
| 46               | 6                | 3.252112                | 2.105584  | 1.435969  |
| 47               | 1                | 4.204598                | 1.610651  | 1.293073  |

(d) **Ru(ONO)<sub>2</sub>**

Energy of optimized structure = -1429.55791531 a.u.

Cartesian coordinates of the optimized structure:

| Centre<br>Number | Atomic<br>Number | Coordinates (Angstroms) |           |           |
|------------------|------------------|-------------------------|-----------|-----------|
|                  |                  | X                       | Y         | Z         |
| 1                | 44               | 0.000024                | -0.000115 | -0.262163 |
| 2                | 7                | -1.951127               | -0.290515 | -0.027919 |
| 3                | 7                | 1.951188                | 0.290409  | -0.027707 |
| 4                | 8                | 0.024521                | -1.589885 | 0.992780  |
| 5                | 6                | -2.314325               | -1.334072 | 0.785012  |
| 6                | 6                | -1.163976               | -2.015623 | 1.323002  |
| 7                | 6                | -1.345121               | -3.128894 | 2.179940  |
| 8                | 1                | -0.464036               | -3.618555 | 2.581731  |
| 9                | 6                | -2.622313               | -3.563459 | 2.465410  |
| 10               | 1                | -2.765069               | -4.420025 | 3.118535  |
| 11               | 6                | -3.754791               | -2.927402 | 1.898249  |
| 12               | 1                | -4.746813               | -3.319739 | 2.100418  |
| 13               | 6                | -3.611830               | -1.831197 | 1.072238  |
| 14               | 1                | -4.483592               | -1.397037 | 0.602430  |
| 15               | 8                | -0.724242               | 1.174011  | -1.792538 |
| 16               | 6                | -2.731351               | 0.687165  | -0.620257 |
| 17               | 6                | -1.987590               | 1.445640  | -1.595520 |
| 18               | 6                | -2.659993               | 2.444296  | -2.339502 |
| 19               | 1                | -2.098692               | 2.989719  | -3.091121 |
| 20               | 6                | -3.989560               | 2.717368  | -2.077930 |
| 21               | 1                | -4.495710               | 3.495300  | -2.643776 |
| 22               | 6                | -4.696762               | 2.026017  | -1.067941 |
| 23               | 1                | -5.725643               | 2.293473  | -0.848078 |
| 24               | 6                | -4.077209               | 1.024088  | -0.344106 |
| 25               | 1                | -4.610415               | 0.538444  | 0.462333  |
| 26               | 8                | 0.724482                | -1.174530 | -1.792166 |
| 27               | 6                | 2.731548                | -0.687191 | -0.619994 |
| 28               | 6                | 1.987887                | -1.445889 | -1.595157 |
| 29               | 6                | 2.660362                | -2.444573 | -2.339030 |
| 30               | 1                | 2.099063                | -2.990180 | -3.090519 |
| 31               | 6                | 3.989992                | -2.717399 | -2.077567 |
| 32               | 1                | 4.496220                | -3.495321 | -2.643358 |
| 33               | 6                | 4.697161                | -2.025771 | -1.067756 |
| 34               | 1                | 5.726125                | -2.292978 | -0.847976 |
| 35               | 6                | 4.077507                | -1.023860 | -0.343988 |
| 36               | 1                | 4.610782                | -0.538039 | 0.462304  |
| 37               | 8                | -0.024735               | 1.589943  | 0.992422  |
| 38               | 6                | 2.314190                | 1.334133  | 0.785169  |
| 39               | 6                | 1.163699                | 2.015749  | 1.322798  |
| 40               | 6                | 1.344599                | 3.129195  | 2.179560  |
| 41               | 1                | 0.463390                | 3.618888  | 2.581045  |
| 42               | 6                | 2.621704                | 3.563869  | 2.465269  |
| 43               | 1                | 2.764272                | 4.420560  | 3.118276  |
| 44               | 6                | 3.754332                | 2.927728  | 1.898501  |
| 45               | 1                | 4.746301                | 3.320100  | 2.100862  |
| 46               | 6                | 3.611602                | 1.831369  | 1.072646  |
| 47               | 1                | 4.483544                | 1.397174  | 0.603183  |

(e) **Ru(DOPO)<sub>2</sub>**

Energy of optimized structure = -1577.59515354 a.u.

Cartesian coordinates of the optimized structure:

| Centre<br>Number | Atomic<br>Number | Coordinates (Angstroms) |           |           |
|------------------|------------------|-------------------------|-----------|-----------|
|                  |                  | X                       | Y         | Z         |
| 1                | 44               | 0.000000                | 0.000000  | 0.000000  |
| 2                | 7                | 0.000000                | 0.000000  | 1.938067  |
| 3                | 8                | 0.000000                | 0.000000  | 4.719087  |
| 4                | 8                | 0.000000                | 2.098134  | 0.471492  |
| 5                | 6                | 0.000000                | 1.162691  | 2.609218  |
| 6                | 6                | 0.000000                | 2.311256  | 1.755737  |
| 7                | 6                | 0.000000                | 3.559354  | 2.424550  |
| 8                | 1                | 0.000000                | 4.481437  | 1.853674  |
| 9                | 6                | 0.000000                | 3.574765  | 3.817288  |
| 10               | 1                | 0.000000                | 4.541312  | 4.315331  |
| 11               | 6                | 0.000000                | 2.420822  | 4.644021  |
| 12               | 1                | 0.000000                | 2.502343  | 5.724259  |
| 13               | 6                | 0.000000                | 1.189824  | 4.020426  |
| 14               | 8                | 0.000000                | -2.098134 | 0.471492  |
| 15               | 6                | 0.000000                | -1.162691 | 2.609218  |
| 16               | 6                | 0.000000                | -2.311256 | 1.755737  |
| 17               | 6                | 0.000000                | -3.559354 | 2.424550  |
| 18               | 1                | 0.000000                | -4.481437 | 1.853674  |
| 19               | 6                | 0.000000                | -3.574765 | 3.817288  |
| 20               | 1                | 0.000000                | -4.541312 | 4.315331  |
| 21               | 6                | 0.000000                | -2.420822 | 4.644021  |
| 22               | 1                | 0.000000                | -2.502343 | 5.724259  |
| 23               | 6                | 0.000000                | -1.189824 | 4.020426  |
| 24               | 7                | 0.000000                | 0.000000  | -1.938067 |
| 25               | 8                | 0.000000                | 0.000000  | -4.719087 |
| 26               | 8                | -2.098134               | 0.000000  | -0.471492 |
| 27               | 6                | -1.162691               | 0.000000  | -2.609218 |
| 28               | 6                | -2.311256               | 0.000000  | -1.755737 |
| 29               | 6                | -3.559354               | 0.000000  | -2.424550 |
| 30               | 1                | -4.481437               | 0.000000  | -1.853674 |
| 31               | 6                | -3.574765               | 0.000000  | -3.817288 |
| 32               | 1                | -4.541312               | 0.000000  | -4.315331 |
| 33               | 6                | -2.420822               | 0.000000  | -4.644021 |
| 34               | 1                | -2.502343               | 0.000000  | -5.724259 |
| 35               | 6                | -1.189824               | 0.000000  | -4.020426 |
| 36               | 8                | 2.098134                | 0.000000  | -0.471492 |
| 37               | 6                | 1.162691                | 0.000000  | -2.609218 |
| 38               | 6                | 2.311256                | 0.000000  | -1.755737 |
| 39               | 6                | 3.559354                | 0.000000  | -2.424550 |
| 40               | 1                | 4.481437                | 0.000000  | -1.853674 |
| 41               | 6                | 3.574765                | 0.000000  | -3.817288 |
| 42               | 1                | 4.541312                | 0.000000  | -4.315331 |
| 43               | 6                | 2.420822                | 0.000000  | -4.644021 |
| 44               | 1                | 2.502343                | 0.000000  | -5.724259 |
| 45               | 6                | 1.189824                | 0.000000  | -4.020426 |

(f)  $[\text{Rh}(\text{ONO})_2]^+$ 

Energy of optimized structure = -1444.98299077 a.u.

Cartesian coordinates of the optimized structure:

| Centre<br>Number | Atomic<br>Number | Coordinates (Angstroms) |           |           |
|------------------|------------------|-------------------------|-----------|-----------|
|                  |                  | X                       | Y         | Z         |
| 1                | 45               | -0.000042               | -0.000221 | -0.000026 |
| 2                | 7                | -2.006408               | -0.000054 | -0.000171 |
| 3                | 7                | 2.006390                | -0.000097 | 0.000194  |
| 4                | 8                | -0.263740               | -1.432516 | 1.433231  |
| 5                | 6                | -2.534265               | -0.977333 | 0.777712  |
| 6                | 6                | -1.523845               | -1.700309 | 1.558063  |
| 7                | 6                | -1.954282               | -2.701577 | 2.473867  |
| 8                | 1                | -1.199522               | -3.208088 | 3.065377  |
| 9                | 6                | -3.287199               | -3.012849 | 2.564982  |
| 10               | 1                | -3.609156               | -3.787892 | 3.254472  |
| 11               | 6                | -4.266452               | -2.362772 | 1.751196  |
| 12               | 1                | -5.303281               | -2.675311 | 1.815677  |
| 13               | 6                | -3.905625               | -1.369654 | 0.880441  |
| 14               | 1                | -4.651144               | -0.925378 | 0.236402  |
| 15               | 8                | -0.263256               | 1.432533  | -1.432937 |
| 16               | 6                | -2.533964               | 0.977283  | -0.778126 |
| 17               | 6                | -1.523295               | 1.700363  | -1.558088 |
| 18               | 6                | -1.953443               | 2.701834  | -2.473824 |
| 19               | 1                | -1.198493               | 3.208422  | -3.065024 |
| 20               | 6                | -3.286315               | 3.013162  | -2.565270 |
| 21               | 1                | -3.608055               | 3.788338  | -3.254713 |
| 22               | 6                | -4.265829               | 2.362962  | -1.751869 |
| 23               | 1                | -5.302630               | 2.675542  | -1.816600 |
| 24               | 6                | -3.905285               | 1.369695  | -0.881178 |
| 25               | 1                | -4.651007               | 0.925338  | -0.237430 |
| 26               | 8                | 0.263791                | -1.432164 | -1.433560 |
| 27               | 6                | 2.534260                | -0.977223 | -0.777820 |
| 28               | 6                | 1.523880                | -1.699955 | -1.558409 |
| 29               | 6                | 1.954377                | -2.700986 | -2.474432 |
| 30               | 1                | 1.199672                | -3.207321 | -3.066163 |
| 31               | 6                | 3.287296                | -3.012292 | -2.565466 |
| 32               | 1                | 3.609291                | -3.787172 | -3.255122 |
| 33               | 6                | 4.266493                | -2.362521 | -1.751371 |
| 34               | 1                | 5.303299                | -2.675153 | -1.815767 |
| 35               | 6                | 3.905609                | -1.369602 | -0.880413 |
| 36               | 1                | 4.650998                | -0.925564 | -0.236078 |
| 37               | 8                | 0.263286                | 1.431983  | 1.433415  |
| 38               | 6                | 2.533949                | 0.977156  | 0.778222  |
| 39               | 6                | 1.523294                | 1.699935  | 1.558509  |
| 40               | 6                | 1.953487                | 2.701161  | 2.474496  |
| 41               | 1                | 1.198593                | 3.207496  | 3.065983  |
| 42               | 6                | 3.286341                | 3.012623  | 2.565766  |
| 43               | 1                | 3.608114                | 3.787639  | 3.255372  |
| 44               | 6                | 4.265793                | 2.362828  | 1.751952  |
| 45               | 1                | 5.302547                | 2.675598  | 1.816532  |
| 46               | 6                | 3.905234                | 1.369751  | 0.881054  |
| 47               | 1                | 4.650823                | 0.925719  | 0.236952  |

(g)  $[\text{Re}(\text{ONO})_2]^+$ 

Energy of optimized structure = -1412.79441304 a.u.

Cartesian coordinates of the optimized structure:

| Centre<br>Number | Atomic<br>Number | Coordinates (Angstroms) |           |           |
|------------------|------------------|-------------------------|-----------|-----------|
|                  |                  | X                       | Y         | Z         |
| 1                | 75               | 0.000000                | 0.000000  | 0.000000  |
| 2                | 7                | 0.000000                | 0.000000  | 2.030141  |
| 3                | 7                | 0.000000                | 0.000000  | -2.030141 |
| 4                | 8                | -1.359147               | 1.357123  | 0.392067  |
| 5                | 6                | -0.825989               | 0.948466  | 2.646433  |
| 6                | 6                | -1.584070               | 1.667718  | 1.678260  |
| 7                | 6                | -2.499188               | 2.657178  | 2.042419  |
| 8                | 1                | -3.062390               | 3.171766  | 1.271525  |
| 9                | 6                | -2.640238               | 2.958347  | 3.391928  |
| 10               | 1                | -3.341942               | 3.726904  | 3.700194  |
| 11               | 6                | -1.866155               | 2.293715  | 4.359087  |
| 12               | 1                | -1.966006               | 2.564673  | 5.405066  |
| 13               | 6                | -0.962252               | 1.299565  | 4.002728  |
| 14               | 1                | -0.356131               | 0.846729  | 4.771945  |
| 15               | 8                | 1.359147                | -1.357123 | 0.392067  |
| 16               | 6                | 0.825989                | -0.948466 | 2.646433  |
| 17               | 6                | 1.584070                | -1.667718 | 1.678260  |
| 18               | 6                | 2.499188                | -2.657178 | 2.042419  |
| 19               | 1                | 3.062390                | -3.171766 | 1.271525  |
| 20               | 6                | 2.640238                | -2.958347 | 3.391928  |
| 21               | 1                | 3.341942                | -3.726904 | 3.700194  |
| 22               | 6                | 1.866155                | -2.293715 | 4.359087  |
| 23               | 1                | 1.966006                | -2.564673 | 5.405066  |
| 24               | 6                | 0.962252                | -1.299565 | 4.002728  |
| 25               | 1                | 0.356131                | -0.846729 | 4.771945  |
| 26               | 8                | 1.359147                | 1.357123  | -0.392067 |
| 27               | 6                | 0.825989                | 0.948466  | -2.646433 |
| 28               | 6                | 1.584070                | 1.667718  | -1.678260 |
| 29               | 6                | 2.499188                | 2.657178  | -2.042419 |
| 30               | 1                | 3.062390                | 3.171766  | -1.271525 |
| 31               | 6                | 2.640238                | 2.958347  | -3.391928 |
| 32               | 1                | 3.341942                | 3.726904  | -3.700194 |
| 33               | 6                | 1.866155                | 2.293715  | -4.359087 |
| 34               | 1                | 1.966006                | 2.564673  | -5.405066 |
| 35               | 6                | 0.962252                | 1.299565  | -4.002728 |
| 36               | 1                | 0.356131                | 0.846729  | -4.771945 |
| 37               | 8                | -1.359147               | -1.357123 | -0.392067 |
| 38               | 6                | -0.825989               | -0.948466 | -2.646433 |
| 39               | 6                | -1.584070               | -1.667718 | -1.678260 |
| 40               | 6                | -2.499188               | -2.657178 | -2.042419 |
| 41               | 1                | -3.062390               | -3.171766 | -1.271525 |
| 42               | 6                | -2.640238               | -2.958347 | -3.391928 |
| 43               | 1                | -3.341942               | -3.726904 | -3.700194 |
| 44               | 6                | -1.866155               | -2.293715 | -4.359087 |
| 45               | 1                | -1.966006               | -2.564673 | -5.405066 |
| 46               | 6                | -0.962252               | -1.299565 | -4.002728 |
| 47               | 1                | -0.356131               | -0.846729 | -4.771945 |

**(h) [Re(ONO)<sub>2</sub>]<sup>-</sup> minimum-energy (C<sub>2</sub>) structure**

Energy of optimized structure = -1413.10935399 a.u.

Cartesian coordinates of the optimized structure:

| Centre<br>Number | Atomic<br>Number | Coordinates (Angstroms) |           |           |
|------------------|------------------|-------------------------|-----------|-----------|
|                  |                  | X                       | Y         | Z         |
| 1                | 75               | -0.000002               | 0.000013  | -0.425483 |
| 2                | 7                | 1.883075                | 0.409134  | 0.211206  |
| 3                | 7                | -1.883079               | -0.409070 | 0.211294  |
| 4                | 8                | -0.165262               | 1.827498  | 0.356597  |
| 5                | 6                | 2.088273                | 1.571112  | 0.944193  |
| 6                | 6                | 0.887641                | 2.325684  | 1.022469  |
| 7                | 6                | 0.840317                | 3.534084  | 1.719582  |
| 8                | 1                | -0.098789               | 4.078505  | 1.762501  |
| 9                | 6                | 2.003770                | 4.020414  | 2.320778  |
| 10               | 1                | 1.977051                | 4.962347  | 2.863862  |
| 11               | 6                | 3.202130                | 3.306420  | 2.213972  |
| 12               | 1                | 4.109778                | 3.698013  | 2.667910  |
| 13               | 6                | 3.254672                | 2.089084  | 1.528880  |
| 14               | 1                | 4.198565                | 1.566582  | 1.436089  |
| 15               | 8                | 1.153550                | -0.735317 | -1.927536 |
| 16               | 6                | 2.840273                | -0.473966 | -0.308124 |
| 17               | 6                | 2.368644                | -1.098269 | -1.498603 |
| 18               | 6                | 3.185165                | -2.003453 | -2.186482 |
| 19               | 1                | 2.807696                | -2.458493 | -3.098011 |
| 20               | 6                | 4.452738                | -2.306331 | -1.686689 |
| 21               | 1                | 5.085809                | -3.013167 | -2.219084 |
| 22               | 6                | 4.906192                | -1.721688 | -0.498979 |
| 23               | 1                | 5.884363                | -1.982541 | -0.101544 |
| 24               | 6                | 4.103692                | -0.810983 | 0.194887  |
| 25               | 1                | 4.447270                | -0.400498 | 1.137437  |
| 26               | 8                | -1.153615               | 0.735314  | -1.927591 |
| 27               | 6                | -2.840315               | 0.473925  | -0.308151 |
| 28               | 6                | -2.368716               | 1.098229  | -1.498653 |
| 29               | 6                | -3.185279               | 2.003393  | -2.186508 |
| 30               | 1                | -2.807852               | 2.458444  | -3.098047 |
| 31               | 6                | -4.452850               | 2.306248  | -1.686680 |
| 32               | 1                | -5.085947               | 3.013075  | -2.219057 |
| 33               | 6                | -4.906255               | 1.721615  | -0.498951 |
| 34               | 1                | -5.884413               | 1.982467  | -0.101483 |
| 35               | 6                | -4.103710               | 0.810941  | 0.194910  |
| 36               | 1                | -4.447193               | 0.400529  | 1.137481  |
| 37               | 8                | 0.165194                | -1.827593 | 0.356271  |
| 38               | 6                | -2.088230               | -1.571118 | 0.944220  |
| 39               | 6                | -0.887615               | -2.325707 | 1.022352  |
| 40               | 6                | -0.840224               | -3.534065 | 1.719535  |
| 41               | 1                | 0.098877                | -4.078500 | 1.762372  |
| 42               | 6                | -2.003610               | -4.020333 | 2.320915  |
| 43               | 1                | -1.976837               | -4.962235 | 2.864066  |
| 44               | 6                | -3.201975               | -3.306337 | 2.214195  |
| 45               | 1                | -4.109570               | -3.697882 | 2.668275  |
| 46               | 6                | -3.254578               | -2.089035 | 1.529045  |
| 47               | 1                | -4.198438               | -1.566494 | 1.436369  |



(i)  $[\text{Re}(\text{ONO})_2]^-$  constrained to  $D_2$  symmetry

Energy of optimized structure = -1413.06961135 a.u.

Cartesian coordinates of the optimized structure:

| Centre<br>Number | Atomic<br>Number | Coordinates (Angstroms) |           |           |
|------------------|------------------|-------------------------|-----------|-----------|
|                  |                  | X                       | Y         | Z         |
| 1                | 75               | 0.000000                | 0.000000  | 0.000000  |
| 2                | 7                | 0.000000                | 0.000000  | 2.033481  |
| 3                | 7                | 0.000000                | 0.000000  | -2.033481 |
| 4                | 8                | -1.453452               | 1.366818  | 0.478627  |
| 5                | 6                | -0.770632               | 0.986313  | 2.678884  |
| 6                | 6                | -1.584768               | 1.694222  | 1.746063  |
| 7                | 6                | -2.460495               | 2.698131  | 2.194474  |
| 8                | 1                | -3.087032               | 3.204461  | 1.465824  |
| 9                | 6                | -2.478237               | 3.041723  | 3.543187  |
| 10               | 1                | -3.147403               | 3.827794  | 3.887250  |
| 11               | 6                | -1.623339               | 2.404845  | 4.452537  |
| 12               | 1                | -1.611406               | 2.706839  | 5.496746  |
| 13               | 6                | -0.769928               | 1.385508  | 4.024522  |
| 14               | 1                | -0.080871               | 0.944294  | 4.731807  |
| 15               | 8                | 1.453452                | -1.366818 | 0.478627  |
| 16               | 6                | 0.770632                | -0.986313 | 2.678884  |
| 17               | 6                | 1.584768                | -1.694222 | 1.746063  |
| 18               | 6                | 2.460495                | -2.698131 | 2.194474  |
| 19               | 1                | 3.087032                | -3.204461 | 1.465824  |
| 20               | 6                | 2.478237                | -3.041723 | 3.543187  |
| 21               | 1                | 3.147403                | -3.827794 | 3.887250  |
| 22               | 6                | 1.623339                | -2.404845 | 4.452537  |
| 23               | 1                | 1.611406                | -2.706839 | 5.496746  |
| 24               | 6                | 0.769928                | -1.385508 | 4.024522  |
| 25               | 1                | 0.080871                | -0.944294 | 4.731807  |
| 26               | 8                | 1.453452                | 1.366818  | -0.478627 |
| 27               | 6                | 0.770632                | 0.986313  | -2.678884 |
| 28               | 6                | 1.584768                | 1.694222  | -1.746063 |
| 29               | 6                | 2.460495                | 2.698131  | -2.194474 |
| 30               | 1                | 3.087032                | 3.204461  | -1.465824 |
| 31               | 6                | 2.478237                | 3.041723  | -3.543187 |
| 32               | 1                | 3.147403                | 3.827794  | -3.887250 |
| 33               | 6                | 1.623339                | 2.404845  | -4.452537 |
| 34               | 1                | 1.611406                | 2.706839  | -5.496746 |
| 35               | 6                | 0.769928                | 1.385508  | -4.024522 |
| 36               | 1                | 0.080871                | 0.944294  | -4.731807 |
| 37               | 8                | -1.453452               | -1.366818 | -0.478627 |
| 38               | 6                | -0.770632               | -0.986313 | -2.678884 |
| 39               | 6                | -1.584768               | -1.694222 | -1.746063 |
| 40               | 6                | -2.460495               | -2.698131 | -2.194474 |
| 41               | 1                | -3.087032               | -3.204461 | -1.465824 |
| 42               | 6                | -2.478237               | -3.041723 | -3.543187 |
| 43               | 1                | -3.147403               | -3.827794 | -3.887250 |
| 44               | 6                | -1.623339               | -2.404845 | -4.452537 |
| 45               | 1                | -1.611406               | -2.706839 | -5.496746 |
| 46               | 6                | -0.769928               | -1.385508 | -4.024522 |
| 47               | 1                | -0.080871               | -0.944294 | -4.731807 |

**(j) Os(ONO)<sub>2</sub> minimum-energy (C<sub>2</sub>) structure**

Energy of optimized structure = -1425.37051482 a.u.

Cartesian coordinates of the optimized structure:

| Centre<br>Number | Atomic<br>Number | Coordinates (Angstroms) |           |           |
|------------------|------------------|-------------------------|-----------|-----------|
|                  |                  | X                       | Y         | Z         |
| 1                | 76               | 0.000059                | -0.000010 | -0.344421 |
| 2                | 7                | 1.898557                | 0.407344  | 0.104769  |
| 3                | 7                | -1.898447               | -0.407311 | 0.104771  |
| 4                | 8                | -0.173482               | 1.754567  | 0.586096  |
| 5                | 6                | 2.147019                | 1.541923  | 0.860874  |
| 6                | 6                | 0.943945                | 2.254394  | 1.114472  |
| 7                | 6                | 0.953533                | 3.446278  | 1.853413  |
| 8                | 1                | 0.016128                | 3.961966  | 2.034639  |
| 9                | 6                | 2.167446                | 3.934694  | 2.315917  |
| 10               | 1                | 2.191744                | 4.857812  | 2.887833  |
| 11               | 6                | 3.369244                | 3.257546  | 2.035557  |
| 12               | 1                | 4.312317                | 3.671019  | 2.380411  |
| 13               | 6                | 3.371809                | 2.072032  | 1.313051  |
| 14               | 1                | 4.309276                | 1.588882  | 1.072862  |
| 15               | 8                | 0.985453                | -0.911256 | -1.862694 |
| 16               | 6                | 2.795155                | -0.539144 | -0.398712 |
| 17               | 6                | 2.220288                | -1.250772 | -1.492278 |
| 18               | 6                | 2.968934                | -2.228777 | -2.164317 |
| 19               | 1                | 2.519163                | -2.750561 | -3.002693 |
| 20               | 6                | 4.259207                | -2.507507 | -1.730983 |
| 21               | 1                | 4.843378                | -3.265492 | -2.245614 |
| 22               | 6                | 4.812095                | -1.840642 | -0.623375 |
| 23               | 1                | 5.808665                | -2.099432 | -0.278543 |
| 24               | 6                | 4.087952                | -0.862340 | 0.047988  |
| 25               | 1                | 4.504285                | -0.390613 | 0.929046  |
| 26               | 8                | -0.985578               | 0.910934  | -1.863083 |
| 27               | 6                | -2.795054               | 0.539119  | -0.398795 |
| 28               | 6                | -2.220291               | 1.250596  | -1.492522 |
| 29               | 6                | -2.969012               | 2.228588  | -2.164534 |
| 30               | 1                | -2.519350               | 2.750267  | -3.003036 |
| 31               | 6                | -4.259192               | 2.507431  | -1.731017 |
| 32               | 1                | -4.843401               | 3.265400  | -2.245628 |
| 33               | 6                | -4.811946               | 1.840729  | -0.623225 |
| 34               | 1                | -5.808424               | 2.099656  | -0.278235 |
| 35               | 6                | -4.087751               | 0.862458  | 0.048110  |
| 36               | 1                | -4.503955               | 0.390814  | 0.929381  |
| 37               | 8                | 0.173503                | -1.754604 | 0.586453  |
| 38               | 6                | -2.147024               | -1.541859 | 0.860844  |
| 39               | 6                | -0.943983               | -2.254312 | 1.114735  |
| 40               | 6                | -0.953752               | -3.446117 | 1.853831  |
| 41               | 1                | -0.016394               | -3.961797 | 2.035321  |
| 42               | 6                | -2.167770               | -3.934491 | 2.316080  |
| 43               | 1                | -2.192198               | -4.857557 | 2.888075  |
| 44               | 6                | -3.369528               | -3.257405 | 2.035336  |
| 45               | 1                | -4.312680               | -3.670887 | 2.379965  |
| 46               | 6                | -3.371930               | -2.071965 | 1.312726  |
| 47               | 1                | -4.309375               | -1.588825 | 1.072190  |

**(k) Os(ONO)<sub>2</sub> constrained to D<sub>2</sub> symmetry**

Energy of optimized structure = -1425.35423815 a.u.

Cartesian coordinates of the optimized structure:

| Centre<br>Number | Atomic<br>Number | Coordinates (Angstroms) |           |           |
|------------------|------------------|-------------------------|-----------|-----------|
|                  |                  | X                       | Y         | Z         |
| 1                | 76               | 0.000000                | 0.000000  | 0.000000  |
| 2                | 7                | 0.000000                | 0.000000  | 1.997827  |
| 3                | 7                | 0.000000                | 0.000000  | -1.997827 |
| 4                | 8                | -1.463952               | 1.403593  | 0.385371  |
| 5                | 6                | -0.783948               | 0.972778  | 2.607654  |
| 6                | 6                | -1.588522               | 1.687479  | 1.653703  |
| 7                | 6                | -2.487255               | 2.681528  | 2.106521  |
| 8                | 1                | -3.106123               | 3.188123  | 1.373281  |
| 9                | 6                | -2.528639               | 3.000971  | 3.449133  |
| 10               | 1                | -3.208068               | 3.775908  | 3.794034  |
| 11               | 6                | -1.676792               | 2.361219  | 4.378823  |
| 12               | 1                | -1.686104               | 2.667722  | 5.420119  |
| 13               | 6                | -0.814030               | 1.362601  | 3.968355  |
| 14               | 1                | -0.128473               | 0.930270  | 4.682807  |
| 15               | 8                | 1.463952                | -1.403593 | 0.385371  |
| 16               | 6                | 0.783948                | -0.972778 | 2.607654  |
| 17               | 6                | 1.588522                | -1.687479 | 1.653703  |
| 18               | 6                | 2.487255                | -2.681528 | 2.106521  |
| 19               | 1                | 3.106123                | -3.188123 | 1.373281  |
| 20               | 6                | 2.528639                | -3.000971 | 3.449133  |
| 21               | 1                | 3.208068                | -3.775908 | 3.794034  |
| 22               | 6                | 1.676792                | -2.361219 | 4.378823  |
| 23               | 1                | 1.686104                | -2.667722 | 5.420119  |
| 24               | 6                | 0.814030                | -1.362601 | 3.968355  |
| 25               | 1                | 0.128473                | -0.930270 | 4.682807  |
| 26               | 8                | 1.463952                | 1.403593  | -0.385371 |
| 27               | 6                | 0.783948                | 0.972778  | -2.607654 |
| 28               | 6                | 1.588522                | 1.687479  | -1.653703 |
| 29               | 6                | 2.487255                | 2.681528  | -2.106521 |
| 30               | 1                | 3.106123                | 3.188123  | -1.373281 |
| 31               | 6                | 2.528639                | 3.000971  | -3.449133 |
| 32               | 1                | 3.208068                | 3.775908  | -3.794034 |
| 33               | 6                | 1.676792                | 2.361219  | -4.378823 |
| 34               | 1                | 1.686104                | 2.667722  | -5.420119 |
| 35               | 6                | 0.814030                | 1.362601  | -3.968355 |
| 36               | 1                | 0.128473                | 0.930270  | -4.682807 |
| 37               | 8                | -1.463952               | -1.403593 | -0.385371 |
| 38               | 6                | -0.783948               | -0.972778 | -2.607654 |
| 39               | 6                | -1.588522               | -1.687479 | -1.653703 |
| 40               | 6                | -2.487255               | -2.681528 | -2.106521 |
| 41               | 1                | -3.106123               | -3.188123 | -1.373281 |
| 42               | 6                | -2.528639               | -3.000971 | -3.449133 |
| 43               | 1                | -3.208068               | -3.775908 | -3.794034 |
| 44               | 6                | -1.676792               | -2.361219 | -4.378823 |
| 45               | 1                | -1.686104               | -2.667722 | -5.420119 |
| 46               | 6                | -0.814030               | -1.362601 | -3.968355 |
| 47               | 1                | -0.128473               | -0.930270 | -4.682807 |

(I) **Os(DOPO)<sub>2</sub>**

Energy of optimized structure = -1573.39276804 a.u.

Cartesian coordinates of the optimized structure:

| Centre<br>Number | Atomic<br>Number | Coordinates (Angstroms) |           |           |
|------------------|------------------|-------------------------|-----------|-----------|
|                  |                  | X                       | Y         | Z         |
| 1                | 76               | 0.000000                | 0.000000  | 0.000000  |
| 2                | 7                | 0.000000                | 0.000000  | 1.945096  |
| 3                | 8                | 0.000000                | 0.000000  | 4.740787  |
| 4                | 8                | 0.000000                | 2.082279  | 0.491457  |
| 5                | 6                | 0.000000                | 1.165418  | 2.631643  |
| 6                | 6                | 0.000000                | 2.308296  | 1.785260  |
| 7                | 6                | 0.000000                | 3.556680  | 2.442331  |
| 8                | 1                | 0.000000                | 4.477073  | 1.868805  |
| 9                | 6                | 0.000000                | 3.575359  | 3.838101  |
| 10               | 1                | 0.000000                | 4.542693  | 4.334226  |
| 11               | 6                | 0.000000                | 2.423293  | 4.661046  |
| 12               | 1                | 0.000000                | 2.502714  | 5.741553  |
| 13               | 6                | 0.000000                | 1.188390  | 4.037502  |
| 14               | 8                | 0.000000                | -2.082279 | 0.491457  |
| 15               | 6                | 0.000000                | -1.165418 | 2.631643  |
| 16               | 6                | 0.000000                | -2.308296 | 1.785260  |
| 17               | 6                | 0.000000                | -3.556680 | 2.442331  |
| 18               | 1                | 0.000000                | -4.477073 | 1.868805  |
| 19               | 6                | 0.000000                | -3.575359 | 3.838101  |
| 20               | 1                | 0.000000                | -4.542693 | 4.334226  |
| 21               | 6                | 0.000000                | -2.423293 | 4.661046  |
| 22               | 1                | 0.000000                | -2.502714 | 5.741553  |
| 23               | 6                | 0.000000                | -1.188390 | 4.037502  |
| 24               | 7                | 0.000000                | 0.000000  | -1.945096 |
| 25               | 8                | 0.000000                | 0.000000  | -4.740787 |
| 26               | 8                | -2.082279               | 0.000000  | -0.491457 |
| 27               | 6                | -1.165418               | 0.000000  | -2.631643 |
| 28               | 6                | -2.308296               | 0.000000  | -1.785260 |
| 29               | 6                | -3.556680               | 0.000000  | -2.442331 |
| 30               | 1                | -4.477073               | 0.000000  | -1.868805 |
| 31               | 6                | -3.575359               | 0.000000  | -3.838101 |
| 32               | 1                | -4.542693               | 0.000000  | -4.334226 |
| 33               | 6                | -2.423293               | 0.000000  | -4.661046 |
| 34               | 1                | -2.502714               | 0.000000  | -5.741553 |
| 35               | 6                | -1.188390               | 0.000000  | -4.037502 |
| 36               | 8                | 2.082279                | 0.000000  | -0.491457 |
| 37               | 6                | 1.165418                | 0.000000  | -2.631643 |
| 38               | 6                | 2.308296                | 0.000000  | -1.785260 |
| 39               | 6                | 3.556680                | 0.000000  | -2.442331 |
| 40               | 1                | 4.477073                | 0.000000  | -1.868805 |
| 41               | 6                | 3.575359                | 0.000000  | -3.838101 |
| 42               | 1                | 4.542693                | 0.000000  | -4.334226 |
| 43               | 6                | 2.423293                | 0.000000  | -4.661046 |
| 44               | 1                | 2.502714                | 0.000000  | -5.741553 |
| 45               | 6                | 1.188390                | 0.000000  | -4.037502 |

(m)  $[\text{Ir}(\text{ONO})_2]^+$ 

Energy of optimized structure = -1438.79213747 a.u.

Cartesian coordinates of the optimized structure:

| Centre<br>Number | Atomic<br>Number | Coordinates (Angstroms) |           |           |
|------------------|------------------|-------------------------|-----------|-----------|
|                  |                  | X                       | Y         | Z         |
| 1                | 77               | 0.000012                | -0.000200 | -0.000137 |
| 2                | 7                | -2.011089               | -0.000253 | -0.000195 |
| 3                | 7                | 2.011122                | 0.000005  | 0.000199  |
| 4                | 8                | -0.296095               | -1.438298 | 1.447213  |
| 5                | 6                | -2.557508               | -0.983016 | 0.771541  |
| 6                | 6                | -1.562741               | -1.709110 | 1.560074  |
| 7                | 6                | -2.001098               | -2.709897 | 2.466416  |
| 8                | 1                | -1.254445               | -3.218755 | 3.066162  |
| 9                | 6                | -3.337110               | -3.021182 | 2.539654  |
| 10               | 1                | -3.667767               | -3.797830 | 3.223145  |
| 11               | 6                | -4.302643               | -2.370699 | 1.714191  |
| 12               | 1                | -5.340184               | -2.684049 | 1.760183  |
| 13               | 6                | -3.928183               | -1.374207 | 0.850535  |
| 14               | 1                | -4.663270               | -0.932394 | 0.193478  |
| 15               | 8                | -0.295992               | 1.438123  | -1.447434 |
| 16               | 6                | -2.557466               | 0.982709  | -0.771878 |
| 17               | 6                | -1.562666               | 1.708979  | -1.560196 |
| 18               | 6                | -2.001022               | 2.709989  | -2.466283 |
| 19               | 1                | -1.254349               | 3.219011  | -3.065866 |
| 20               | 6                | -3.337044               | 3.021284  | -2.539513 |
| 21               | 1                | -3.667664               | 3.798110  | -3.222822 |
| 22               | 6                | -4.302605               | 2.370587  | -1.714268 |
| 23               | 1                | -5.340158               | 2.683893  | -1.760249 |
| 24               | 6                | -3.928133               | 1.373895  | -0.850831 |
| 25               | 1                | -4.663243               | 0.931878  | -0.193929 |
| 26               | 8                | 0.296390                | -1.438466 | -1.447298 |
| 27               | 6                | 2.557695                | -0.982802 | -0.771412 |
| 28               | 6                | 1.563116                | -1.709102 | -1.559910 |
| 29               | 6                | 2.001690                | -2.710008 | -2.465980 |
| 30               | 1                | 1.255143                | -3.219084 | -3.065672 |
| 31               | 6                | 3.337751                | -3.021154 | -2.539081 |
| 32               | 1                | 3.668528                | -3.797913 | -3.222387 |
| 33               | 6                | 4.303123                | -2.370396 | -1.713713 |
| 34               | 1                | 5.340728                | -2.683550 | -1.759599 |
| 35               | 6                | 3.928417                | -1.373809 | -0.850262 |
| 36               | 1                | 4.663401                | -0.931775 | -0.193272 |
| 37               | 8                | 0.295681                | 1.438499  | 1.446795  |
| 38               | 6                | 2.557325                | 0.983056  | 0.771895  |
| 39               | 6                | 1.562286                | 1.709390  | 1.559924  |
| 40               | 6                | 2.000329                | 2.710527  | 2.466074  |
| 41               | 1                | 1.253461                | 3.219530  | 3.065430  |
| 42               | 6                | 3.336297                | 3.021922  | 2.539581  |
| 43               | 1                | 3.666729                | 3.798821  | 3.222897  |
| 44               | 6                | 4.302101                | 2.371197  | 1.714574  |
| 45               | 1                | 5.339613                | 2.684613  | 1.760760  |
| 46               | 6                | 3.927955                | 1.374401  | 0.851131  |
| 47               | 1                | 4.663275                | 0.932458  | 0.194449  |

**References**

- 
- S1 S. Shekar and S. N. Brown, *Organometallics*, 2013, **32**, 556-564.
- S2 B. R. McGarvey, A. Ozarowski, Z. Tian and D. G. Tuck, *Can. J. Chem.*, 1995, **73**, 1213-1222.
- S3 A. J. Godó, A. C. Bényei, B. Duff, D. A. Egan and P. Buglyó, *RSC Advances*, 2012, **2**, 1486-1495.
- S4 L. G. Ranis, K. Werellapatha, N. J. Pietrini, B. A. Bunker and S. N. Brown, submitted.
- S5 N. G. Connelly and W. E. Geiger, *Chem. Rev.*, 1996, **96**, 877-910.
- S6 D. Lionetti, A. J. Medvecz, V. Ugrinova, M. Quiroz-Guzman, B. C. Noll and S. N. Brown, *Inorg. Chem.*, 2010, **49**, 4687-4697.
- S7 M. J. Frisch, G. W. Trucks, H. B. Schlegel, G. E. Scuseria, M. A. Robb, J. R. Cheeseman, G. Scalmani, V. Barone, B. Mennucci, G. A. Petersson, H. Nakatsuji, M. Caricato, X. Li, H. P. Hratchian, A. F. Izmaylov, J. Bloino, G. Zheng, J. L. Sonnenberg, M. Hada, M. Ehara, K. Toyota, R. Fukuda, J. Hasegawa, M. Ishida, T. Nakajima, Y. Honda, O. Kitao, H. Nakai, T. Vreven, J. A. Montgomery, Jr., J. E. Peralta, F. Ogliaro, M. Bearpark, J. J. Heyd, E. Brothers, K. N. Kudin, V. N. Staroverov, R. Kobayashi, J. Normand, K. Raghavachari, A. Rendell, J. C. Burant, S. S. Iyengar, J. Tomasi, M. Cossi, N. Rega, J. M. Millam, M. Klene, J. E. Knox, J. B. Cross, V. Bakken, C. Adamo, J. Jaramillo, R. Gomperts, R. E. Stratmann, O. Yazyev, A. J. Austin, R. Cammi, C. Pomelli, J. W. Ochterski, R. L. Martin, K. Morokuma, V. G. Zakrzewski, G. A. Voth, P. Salvador, J. J. Dannenberg, S. Dapprich, A. D. Daniels, O. Farkas, J. B. Foresman, J. V. Ortiz, J. Cioslowski and D. J. Fox, *Gaussian 09, Revision A.02*, Gaussian, Inc., Wallingford CT, 2009.
- S8 C. L. Simpson, S. R. Boone and C. G. Pierpont, *Inorg. Chem.*, 1989, **28**, 4379-4385.

- 
- S9 G. M. Sheldrick, *Acta Cryst. A*, 2008, **A64**, 112-122.
- S10 *International Tables for Crystallography*; Kluwer Academic Publishers: Dordrecht, The Netherlands, 1992, Vol C.
- S11 P. van der Sluis and A. L. Spek, *Acta Cryst. A*, 1990, **A46**, 194-201.
- S12 A. L. Spek, *Acta Cryst. D*, 2009, **D65**, 148-155.
